# Supplementary material for: Synthesis of spiro-3H-indazoles via 1,3-dipolar cycloaddition of arynes with 6-diazocyclohex-2-en-1-one derivatives and fused-2H-indazoles by subsequent rearrangement
Source: Royal Society of Chemistry journal article supplement (doi:10.1039/c7ra12117b), 2017-01-01
Supplement: c7ra12117b1.pdf [file c7ra12117b1.pdf]

---

**Supporting Information for**  
**Synthesis of Spiro-3*H*-indazoles via [3+2] Dipolar Cycloaddition of**  
**Arynes with 6-Diazocyclohex-2-en-1-one Derivatives and**  
**Fused-2*H*-indazoles by Subsequent Rearrangement**

Bin Cheng,<sup>\*a</sup> Bian Bao,<sup>a</sup> Bing Zu,<sup>a</sup> Xiaoguang Duan,<sup>a</sup> Shengguo Duan,<sup>a</sup> Yun Li<sup>a</sup> and Hongbin Zhai<sup>\*abc</sup>

<sup>a</sup> State Key Laboratory of Applied Organic Chemistry, College of Chemistry and Chemical Engineering, Lanzhou University, Lanzhou 730000, China. E-mail: chengb@lzu.edu.cn

<sup>b</sup> Key Laboratory of Chemical Genomics, School of Chemical Biology and Biotechnology, Shenzhen Graduate School of Peking University, Shenzhen 518055, China. E-mail: zhaih@pkusz.edu.cn

<sup>c</sup> Collaborative Innovation Center of Chemical Science and Engineering (Tianjin), Tianjin 300071, China

**List of contents**

|                                                                                                                  |                |
|------------------------------------------------------------------------------------------------------------------|----------------|
| <b>1. General</b> .....                                                                                          | <b>S2</b>      |
| <b>2. General Experimental Procedure</b> .....                                                                   | <b>S2-S3</b>   |
| <b>3. Proposed Mechanisms for the Formation of Spiro-3<i>H</i>-indazoles and Fused-2<i>H</i>-indazoles</b> ..... | <b>S3</b>      |
| <b>4. References</b> .....                                                                                       | <b>S4</b>      |
| <b>5. Characterization Data of Products</b> .....                                                                | <b>S5-S9</b>   |
| <b>6. NMR spectra</b> .....                                                                                      | <b>S10-S30</b> |

## 1. General

All isolated compounds were characterized on Varian 300, Bruker 400, JEOL 400 MHz spectrometers in CDCl<sub>3</sub>, (CD<sub>3</sub>)<sub>2</sub>CO or CD<sub>3</sub>OD. Chemical shifts were reported as  $\delta$  values relative to internal CHCl<sub>3</sub> ( $\delta$  7.26 for <sup>1</sup>H NMR and 77.16 for <sup>13</sup>C NMR), (CH<sub>3</sub>)<sub>2</sub>CO ( $\delta$  2.05 for <sup>1</sup>H NMR and  $\delta$  29.84 for <sup>13</sup>C NMR) and MeOH ( $\delta$  3.31 for <sup>1</sup>H NMR and 49.15 for <sup>13</sup>C NMR). High-resolution mass spectra (HRMS) were obtained on a 4G mass spectrometer by using electrospray ionization (ESI) analyzed by quadrupole time-of-flight (QToF). All melting points were measured with the samples after column chromatography and uncorrected. Column chromatography was performed on silica gel. Anhydrous THF and toluene were distilled over sodium benzophenone ketyl under Ar. All other solvents and reagents were used as obtained from commercial sources without further purification.

## 2. General Experimental Procedure

### General Procedure for the Preparation of 6-Diazocyclohex-2-en-1-one Derivatives

**1a** and **1c** were prepared according to the literature.<sup>1</sup> **1b** and **1d–u** were prepared according to the literature.<sup>2</sup>

### General Procedure for the Preparation of **3d–t**.

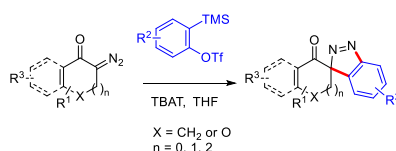

To a solution of diazo compound **1d** (52 mg, 0.30 mmol) and benzyne precursor **2a** (134 mg, 0.450 mmol, 1.5 equiv) in THF (3.0 mL) was added TBAT (243 mg, 0.450 mmol, 1.5 equiv) at 0 °C. Then the mixture was warmed to room temperature. After **1d** was completely depleted monitoring on TLC, the solvent was removed and the resulting residue was purified by flash column chromatography (PE:EA = 10:1) to give **3d** (69 mg, 93%) as a white solid.

**3e–t** were prepared following a similar method. Conditions: **1** (0.30 mmol), **2** (0.45 mmol, 1.5 equiv), TBAT (0.45 mmol, 1.5 equiv), solvent (3 mL), 0 to 20 °C, air.

### Procedure for the Preparation of Fused-2*H*-indazole **4e–u**

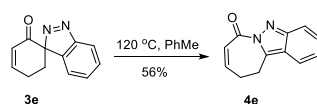

A solution of **3e** (48 mg, 0.24 mmol) in PhMe (2.4 mL) was heated to 110 °C and kept for 12 h. The solvent was removed under reduced pressure and the resulting residue was purified by flash chromatography (PE:EA = 1:2) to give **4e** (27 mg, 56%) as a light yellow oil.

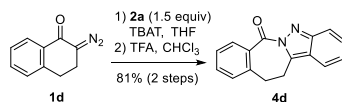

To a solution of diazo compound **1d** (52 mg, 0.30 mmol) and benzyne precursor **2a** (134 mg, 0.450 mmol, 1.5 equiv) in THF (3.0 mL) was added TBAT (243 mg, 0.450 mmol, 1.5 equiv) at 0 °C. Then the mixture was warmed to room temperature. After **1d** was completely depleted monitoring on TLC, the solvent was removed, and the resulting residue was redissolved in TFA/CHCl<sub>3</sub> (1 M, 1.0 mL) at room temperature and the solution was stirred for 5 min. After full conversion, the solvent was removed under reduced pressure and the resulting residue was purified by flash column chromatography (EA) to give **4d** (60 mg, 81% for two steps) as a light

yellow oil.

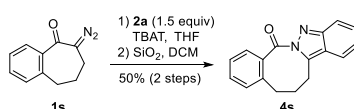

To a solution of diazo compound **1s** (59 mg, 0.32 mmol) and benzyne precursor **2a** (143 mg, 0.479 mmol, 1.5 equiv) in THF (3.2 mL) was added TBAT (259 mg, 0.480 mmol, 1.5 equiv) at 0 °C. Then the mixture was warmed to room temperature. After **1s** was completely depleted monitoring on TLC, the solvent was removed and the resulting residue was passed through a short silica gel column to get the crude spiro indazole **3s**. Then the crude product was redissolved in DCM (3 mL) and added SiO<sub>2</sub> (200 mg). The solution was stirred at room temperature. After full conversion, the solvent was removed under reduced pressure and the resulting residue was purified by flash column chromatography (PE:EA = 1:1) to give **4s** (42 mg, 50% for two steps) as a yellow oil.

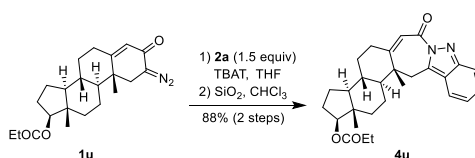

To a solution of diazo compound **1u** (75 mg, 0.20 mmol) and benzyne precursor **2a** (89 mg, 0.30 mmol, 1.5 equiv) in THF (2.0 mL) was added TBAT (162 mg, 0.300 mmol, 1.5 equiv) at 0 °C. Then the mixture was warmed to room temperature. After **1u** was completely depleted monitoring on TLC, the solvent was removed and the resulting residue was passed through a short silica gel column to get the crude spiro indazole **3u**. Then the crude product was redissolved in CHCl<sub>3</sub> (2 mL) and added SiO<sub>2</sub> (125 mg). The solution was stirred at room temperature. After full conversion, the solvent was removed under reduced pressure and the resulting residue was purified by flash column chromatography (PE:EA = 1:2) to give **4u** (78 mg, 88% for two steps) as a yellow oil.

### Procedure for the Preparation of **5d**

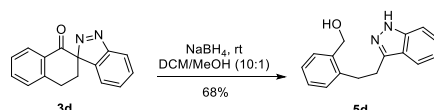

To a solution of spiroindazole **3d** (19 mg, 0.080 mmol) in DCM/MeOH (2.0 mL, 10:1) was added NaBH<sub>4</sub> (ca. 5.0 mg, 0.13 mmol, 1.6 equiv) at room temperature. After the solution was stirred for 15 min, excess CH<sub>3</sub>COCH<sub>3</sub> was added. Then the solvent was removed and the resulting residue was purified by flash column chromatography (EA) to give **5d** (13 mg, 68%) as a white solid.

### 3. Proposed Mechanisms for the Formation of Spiro-3*H*-indazoles and Fused-2*H*-indazoles

The mechanisms were proposed according to the literature.<sup>3</sup>

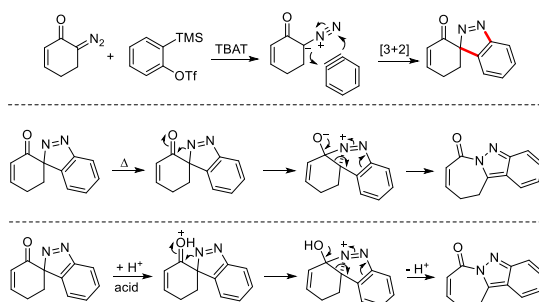

---

#### 4. References

1. Y. Jiang, V. Z. Y. Khong, E. Lourdasamy and C.-M. Park, *Chem. Comm.*, 2012, **48**, 3133.
2. L. Zhao, J. Wang, H. Zheng, Y. Li, K. Yang, B. Cheng, X. Jin, X. Yao and H. Zhai, *Org. Lett.*, 2014, **16**, 6378.
3. (a) M. P. Sammes and A. R. Katritzky, *Adv. Heterocycl. Chem.*, 1983, **34**, 1; (b) Z. Liu, F. Shi, P. D. G. Martinez, C. Raminelli and R. C. Larock, *J. Org. Chem.*, 2008, **73**, 219; (c) D. Vuluga, J. Legros, B. Crousse and D. Bonnet-Delpon, *Green Chem.*, 2009, **11**, 156.

## 5. Characterization Data of Products.

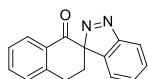

**3d** (69 mg, Y = 93%,  $R_f$  = 0.5 (PE:EA = 5:1)) was isolated as a white solid; mp 107–108 °C.  $^1\text{H}$  NMR (400 MHz,  $(\text{CD}_3)_2\text{CO}$ )  $\delta$  8.21 (d,  $J$  = 7.6 Hz, 1H), 7.94 (dd,  $J$  = 7.6, 0.6 Hz, 1H), 7.71 (td,  $J$  = 7.6, 1.2 Hz, 1H), 7.66–7.62 (m, 2H), 7.57–7.53 (m, 2H), 7.44 (t,  $J$  = 7.2 Hz, 1H), 3.75–3.68 (m, 1H), 3.42–3.34 (m, 1H), 2.69–2.62 (m, 1H), 2.53–2.46 (m, 1H);  $^{13}\text{C}$  NMR (100 MHz,  $(\text{CD}_3)_2\text{CO}$ )  $\delta$  189.3, 159.2, 145.4, 142.5, 135.3, 132.8, 130.9, 130.4, 130.4, 128.6, 127.9, 123.7, 122.4, 101.5, 32.2, 27.6; ESI-HRMS  $m/z$  calcd for  $\text{C}_{16}\text{H}_{13}\text{N}_2\text{O}$   $[\text{M} + \text{H}]^+$  249.1022, found 249.1021.

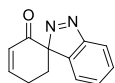

**3e** (47 mg, Y = 79%,  $R_f$  = 0.3 (PE:EA = 2:1)) was isolated as a white solid; mp 98–99 °C.  $^1\text{H}$  NMR (300 MHz,  $\text{CDCl}_3$ )  $\delta$  8.17 (d,  $J$  = 7.5 Hz, 1H), 7.59–7.53 (m, 1H), 7.52–7.45 (m, 2H), 7.41–7.35 (m, 1H), 6.36 (dt,  $J$  = 10.2, 2.1 Hz, 1H), 3.15–3.02 (m, 1H), 2.81–2.69 (m, 1H), 2.50–2.42 (m, 1H), 2.38–2.29 (m, 1H);  $^{13}\text{C}$  NMR (75 MHz,  $\text{CDCl}_3$ )  $\delta$  189.3, 158.0, 152.1, 140.4, 130.2, 129.6, 129.6, 122.4, 122.2, 99.8, 31.0, 24.9; ESI-HRMS  $m/z$  calcd for  $\text{C}_{12}\text{H}_{11}\text{N}_2\text{O}$   $[\text{M} + \text{H}]^+$  199.0866, found 199.0864.

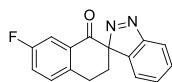

**3f** (64 mg, Y = 80%,  $R_f$  = 0.7 (PE:EA = 2:1)) was isolated as a white solid; mp 99–100 °C.  $^1\text{H}$  NMR (300 MHz,  $(\text{CD}_3)_2\text{CO}$ )  $\delta$  8.23–8.20 (m, 1H), 7.69–7.63 (m, 3H), 7.60–7.48 (m, 3H), 3.75–3.65 (m, 1H), 3.43–3.34 (m, 1H), 2.75–2.65 (m, 1H), 2.52–2.44 (m, 1H);  $^{13}\text{C}$  NMR (75 MHz,  $(\text{CD}_3)_2\text{CO}$ )  $\delta$  188.7, 162.4 (d,  $J$  = 243.7 Hz), 159.3, 142.2, 141.6 (d,  $J$  = 2.3 Hz), 134.3 (d,  $J$  = 6.0 Hz), 132.8 (d,  $J$  = 7.5 Hz), 131.1, 130.5, 123.8, 122.7 (d,  $J$  = 21.8 Hz), 122.5, 113.9 (d,  $J$  = 21.8 Hz), 101.1, 32.3, 27.1; ESI-HRMS  $m/z$  calcd for  $\text{C}_{16}\text{H}_{12}\text{FN}_2\text{O}$   $[\text{M} + \text{H}]^+$  267.0928, found 267.0927.

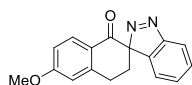

**3g** (65 mg, Y = 78%,  $R_f$  = 0.5 (PE:EA = 2:1)) was isolated as a yellow oil.  $^1\text{H}$  NMR (300 MHz,  $(\text{CD}_3)_2\text{CO}$ )  $\delta$  8.20–8.17 (m, 1H), 7.90 (d,  $J$  = 8.7 Hz, 1H), 7.65–7.61 (m, 1H), 7.61–7.58 (m, 1H), 7.55–7.50 (m, 1H), 7.06 (d,  $J$  = 2.4 Hz, 1H), 6.98 (dd,  $J$  = 8.7, 2.4 Hz, 1H), 3.95 (s, 3H), 3.72–3.62 (m, 1H), 3.39–3.29 (m, 1H), 2.63–2.44 (m, 2H);  $^{13}\text{C}$  NMR (75 MHz,  $(\text{CD}_3)_2\text{CO}$ )  $\delta$  187.6, 165.4, 159.2, 148.0, 142.8, 131.1, 130.8, 130.2, 126.2, 123.6, 122.3, 114.9, 113.7, 101.3, 56.1, 32.2, 27.9; ESI-HRMS  $m/z$  calcd for  $\text{C}_{17}\text{H}_{15}\text{N}_2\text{O}_2$   $[\text{M} + \text{H}]^+$  279.1128, found 279.1129.

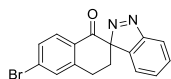

**3h** (93 mg, Y = 95%,  $R_f = 0.15$  (DCM:PE = 1:1)) was isolated as a white solid; mp 103–104 °C.  $^1\text{H}$  NMR (300 MHz,  $(\text{CD}_3)_2\text{CO}$ )  $\delta$  8.21 (d,  $J = 8.4$  Hz, 1H), 8.04 (d,  $J = 2.4$  Hz, 1H), 7.86 (dd,  $J = 8.1, 2.1$  Hz, 1H), 7.69–7.64 (m, 2H), 7.59–7.54 (m, 2H), 3.74–3.63 (m, 1H), 3.41–3.32 (m, 1H), 2.76–2.67 (m, 1H), 2.51–2.43 (m, 1H);  $^{13}\text{C}$  NMR (75 MHz,  $(\text{CD}_3)_2\text{CO}$ )  $\delta$  188.4, 159.3, 144.6, 142.1, 137.9, 134.4, 132.7, 131.1, 130.8, 130.5, 123.8, 122.5, 121.2, 101.1, 32.0, 27.3; ESI-HRMS  $m/z$  calcd For  $\text{C}_{16}\text{H}_{12}\text{BrN}_2\text{O}$   $[\text{M} + \text{H}]^+$  327.0128, found 327.0132.

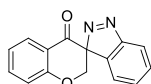

**3i** (51 mg, Y = 68%,  $R_f = 0.9$  (DCM:EA = 30:1)) was isolated as a white solid; mp 112–113 °C.  $^1\text{H}$  NMR (300 MHz,  $\text{CDCl}_3$ )  $\delta$  8.24 (d,  $J = 7.8$  Hz, 1H), 7.95 (dd,  $J = 7.8, 1.2$  Hz, 1H), 7.69–7.59 (m, 2H), 7.50–7.40 (m, 2H), 7.26–7.13 (m, 2H), 5.07 (d,  $J = 11.7$  Hz, 1H), 4.45 (d,  $J = 11.4$  Hz, 1H);  $^{13}\text{C}$  NMR (75 MHz,  $\text{CDCl}_3$ )  $\delta$  183.2, 161.7, 158.7, 137.3, 137.2, 130.7, 130.4, 128.4, 122.8, 122.6, 122.6, 120.4, 118.5, 97.4, 70.8; ESI-HRMS  $m/z$  calcd for  $\text{C}_{15}\text{H}_{11}\text{N}_2\text{O}_2$   $[\text{M} + \text{H}]^+$  251.0815, found 251.0816.

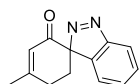

**3j** (55 mg, Y = 87%,  $R_f = 0.6$  (PE:EA = 2:1)) was isolated as a white solid; mp 112–113 °C.  $^1\text{H}$  NMR (300 MHz,  $(\text{CD}_3)_2\text{CO}$ )  $\delta$  8.16–8.13 (m, 1H), 7.63–7.58 (m, 2H), 7.55–7.50 (m, 1H), 6.14–6.12 (m, 1H), 3.05–2.94 (m, 1H), 2.83–2.73 (m, 1H), 2.49–2.41 (m, 1H), 2.38–2.30 (m, 1H), 2.21 (s, 3H);  $^{13}\text{C}$  NMR (75 MHz,  $(\text{CD}_3)_2\text{CO}$ )  $\delta$  189.1, 166.1, 159.0, 142.3, 130.7, 130.2, 126.4, 123.5, 122.2, 100.2, 31.2, 30.1, 24.5; ESI-HRMS  $m/z$  calcd for  $\text{C}_{13}\text{H}_{12}\text{N}_2\text{O} + \text{H}^+$   $[\text{M} + \text{H}]^+$  213.1022, found 213.1021.

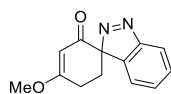

**3k** (45 mg, Y = 66%,  $R_f = 0.5$  (PE:EA = 2:1)) was isolated as a red solid; mp 102–103 °C.  $^1\text{H}$  NMR (300 MHz,  $(\text{CD}_3)_2\text{CO}$ )  $\delta$  8.14 (dd,  $J = 7.5, 0.6$  Hz, 1H), 7.64–7.58 (m, 2H), 7.55–7.51 (m, 1H), 5.66 (s, 1H), 3.91 (s, 3H), 3.05–2.94 (m, 1H), 2.83–2.73 (m, 1H), 2.49–2.30 (m, 2H);  $^{13}\text{C}$  NMR (75 MHz,  $(\text{CD}_3)_2\text{CO}$ )  $\delta$  188.6, 180.0, 159.2, 142.8, 130.6, 130.1, 123.4, 122.2, 103.0, 100.3, 56.8, 29.9, 27.9; ESI-HRMS  $m/z$  calcd for  $\text{C}_{13}\text{H}_{13}\text{N}_2\text{O}_2$   $[\text{M} + \text{H}]^+$  229.0972, found 229.0971.

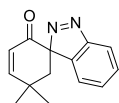

**3l** (60 mg, Y = 88%,  $R_f$  = 0.25 (PE:EA = 5:1)) was isolated as a white solid; mp 68–69 °C.  $^1\text{H}$  NMR (400 MHz,  $(\text{CD}_3)_2\text{CO}$ )  $\delta$  8.17–8.15 (m, 1H), 7.66–7.64 (m, 1H), 7.63–7.55 (m, 2H), 7.21 (d,  $J$  = 10.4 Hz, 1H), 6.16 (d,  $J$  = 10.0 Hz, 1H), 2.84 (d,  $J$  = 14.4 Hz, 1H), 1.72 (dd,  $J$  = 14.4, 2.0 Hz, 1H), 1.60 (s, 3H), 1.33 (s, 3H);  $^{13}\text{C}$  NMR (100 MHz,  $(\text{CD}_3)_2\text{CO}$ )  $\delta$  189.6, 162.0, 159.3, 143.7, 130.9, 130.0, 126.9, 123.8, 122.1, 102.4, 45.2, 34.7, 31.1, 29.0; ESI-HRMS  $m/z$  calcd for  $\text{C}_{14}\text{H}_{15}\text{N}_2\text{O}$  [ $\text{M} + \text{H}$ ] $^+$  227.1179, found 227.1176.

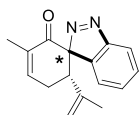

**3m-a** (32 mg, Y = 42%,  $R_f$  = 0.35 (PE:EA = 5:1), with low polarity) was isolated as a colorless oil.  $^1\text{H}$  NMR (300 MHz,  $(\text{CD}_3)_2\text{CO}$ )  $\delta$  8.12–8.09 (m, 1H), 7.66–7.63 (m, 1H), 7.58–7.54 (m, 2H), 7.33–7.30 (m, 1H), 4.63–4.60 (m, 1H), 4.50–4.47 (m, 1H), 3.83–3.76 (m, 1H), 3.52–3.39 (m, 1H), 2.80–2.68 (m, 1H), 1.83–1.81 (m, 3H), 1.25–1.24 (m, 3H);  $^{13}\text{C}$  NMR (75 MHz,  $(\text{CD}_3)_2\text{CO}$ )  $\delta$  190.0, 160.6, 148.0, 143.8, 141.7, 136.1, 130.3, 129.9, 124.9, 121.9, 114.7, 106.4, 51.5, 32.0, 22.0, 16.5; ESI-HRMS  $m/z$  calcd for  $\text{C}_{16}\text{H}_{17}\text{N}_2\text{O}$  [ $\text{M} + \text{H}$ ] $^+$  253.1335, found 253.1335.

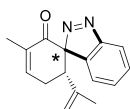

**3m-b** (30 mg, Y = 39%,  $R_f$  = 0.25 (PE:EA = 5:1), with high polarity) was isolated as a colorless oil.  $^1\text{H}$  NMR (300 MHz,  $(\text{CD}_3)_2\text{CO}$ )  $\delta$  8.14–8.11 (m, 1H), 7.64–7.58 (m, 2H), 7.52–7.47 (m, 1H), 7.28–7.24 (m, 1H), 4.54–4.52 (m, 1H), 4.32 (br s, 1H), 4.12–4.07 (m, 1H), 3.09–2.96 (m, 1H), 2.87–2.75 (m, 1H), 1.82–1.80 (m, 3H), 1.38–1.36 (m, 3H);  $^{13}\text{C}$  NMR (75 MHz,  $(\text{CD}_3)_2\text{CO}$ )  $\delta$  189.6, 159.2, 147.5, 143.0, 138.4, 134.9, 130.5, 130.4, 124.1, 122.4, 114.4, 102.7, 48.4, 30.3, 23.0, 16.3; ESI-HRMS  $m/z$  calcd for  $\text{C}_{16}\text{H}_{17}\text{N}_2\text{O}$  [ $\text{M} + \text{H}$ ] $^+$  253.1335, found 253.1334.

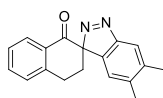

**3n** (71 mg, Y = 86%,  $R_f$  = 0.24 (PE:EA = 5:1)) was isolated as a white solid; mp 140–141 °C.  $^1\text{H}$  NMR (400 MHz,  $\text{CDCl}_3$ )  $\delta$  8.02 (d,  $J$  = 7.6 Hz, 1H), 7.95 (s, 1H), 7.61 (t,  $J$  = 7.2 Hz, 1H), 7.43 (d,  $J$  = 7.6 Hz, 1H), 7.38 (t,  $J$  = 7.6 Hz, 1H), 7.16 (s, 1H), 3.75–3.67 (m, 1H), 3.34–3.27 (m, 1H), 2.60–2.54 (m, 1H), 2.48–2.41 (m, 1H), 2.38 (s, 3H), 2.31 (s, 3H);  $^{13}\text{C}$  NMR (100 MHz,  $\text{CDCl}_3$ )  $\delta$  189.3, 157.5, 144.1, 139.7, 139.1, 138.5, 134.5, 132.1, 129.3, 128.6, 127.2, 123.4, 122.8, 99.7, 31.9, 27.2, 20.5, 20.3; ESI-HRMS  $m/z$  calcd for  $\text{C}_{18}\text{H}_{17}\text{N}_2\text{O}$  [ $\text{M} + \text{H}$ ] $^+$  277.1335, found 277.1336.

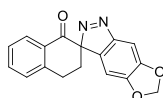

**3o** (70 mg, Y = 80%,  $R_f$  = 0.40 (PE:EA = 3:1)) was isolated as a light yellow solid; mp 189–190 °C.

$^1\text{H}$  NMR (400 MHz,  $(\text{CD}_3)_2\text{CO}$ ) 7.93 (dd,  $J = 7.6, 0.8$  Hz, 1H), 7.71–7.67 (m, 1H), 7.62 (s, 1H), 7.54 (d,  $J = 8.0$  Hz, 1H), 7.48–7.41 (m, 1H), 7.14 (s, 1H), 6.21 (br s, 1H), 6.21 (br s, 1H), 3.79–3.71 (m, 1H), 3.40–3.25 (m, 1H), 2.84–2.75 (m, 1H), 2.31–2.25 (m, 1H);  $^{13}\text{C}$  NMR (100 MHz,  $(\text{CD}_3)_2\text{CO}$ )  $\delta$  189.4, 154.5, 151.6, 150.1, 145.6, 139.3, 135.2, 134.0, 133.1, 130.4, 128.5, 127.8, 104.0, 102.3, 101.1, 32.8, 28.0; ESI-HRMS  $m/z$  calcd for  $\text{C}_{17}\text{H}_{13}\text{N}_2\text{O}_3$   $[\text{M} + \text{H}]^+$  293.0921, found 293.0918.

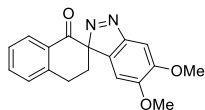

**3p** (65 mg,  $Y = 70\%$ ,  $R_f = 0.15$  (PE:EA = 3:1)) was isolated as a light yellow solid; mp 178–179 °C.  $^1\text{H}$  NMR (400 MHz,  $(\text{CD}_3)_2\text{CO}$ )  $\delta$  7.93 (d,  $J = 8.0$  Hz, 1H), 7.74 (s, 1H), 7.70–7.66 (m, 1H), 7.53 (d,  $J = 8.0$  Hz, 1H), 7.43 (t,  $J = 7.6$  Hz, 1H), 7.29 (s, 1H), 3.97 (s, 3H), 3.85 (s, 3H), 3.81–3.71 (m, 1H), 3.35–3.29 (m, 1H), 2.82–2.75 (m, 1H), 2.26–2.20 (m, 1H);  $^{13}\text{C}$  NMR (100 MHz,  $(\text{CD}_3)_2\text{CO}$ )  $\delta$  189.8, 153.5, 152.8, 151.4, 145.6, 136.9, 135.1, 133.2, 130.3, 128.5, 127.8, 106.2, 104.7, 101.5, 56.5, 56.5, 32.9, 28.0; ESI-HRMS  $m/z$  calcd for  $\text{C}_{18}\text{H}_{17}\text{N}_2\text{O}_3$   $[\text{M} + \text{H}]^+$  309.1234, found 309.1233.

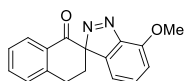

**3q** (77 mg,  $Y = 92\%$ ,  $R_f = 0.35$  (PE:EA = 3:1)) was isolated as a yellow solid; mp 118–119 °C.  $^1\text{H}$  NMR (400 MHz,  $(\text{CD}_3)_2\text{CO}$ )  $\delta$  7.94 (dd,  $J = 7.8, 0.8$  Hz, 1H), 7.70 (td,  $J = 7.6, 1.2$  Hz, 1H), 7.56 (d,  $J = 8.0$  Hz, 1H), 7.50–7.43 (m, 2H), 7.19 (d,  $J = 8.0$  Hz, 1H), 7.13 (dd,  $J = 7.2, 0.4$  Hz, 1H), 4.17 (s, 3H), 3.75–3.67 (m, 1H), 3.40–3.33 (m, 1H), 2.68–2.61 (m, 1H), 2.49–2.42 (m, 1H);  $^{13}\text{C}$  NMR (100 MHz,  $(\text{CD}_3)_2\text{CO}$ )  $\delta$  189.8, 154.3, 148.5, 146.0, 145.9, 135.8, 133.4, 133.4, 130.9, 129.1, 128.4, 116.0, 114.7, 101.8, 57.9, 32.9, 28.0; ESI-HRMS  $m/z$  calcd for  $\text{C}_{17}\text{H}_{15}\text{N}_2\text{O}_2$   $[\text{M} + \text{H}]^+$  279.1128, found 279.1130.

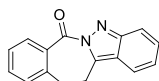

**4d** (60 mg,  $Y = 81\%$  for two steps,  $R_f = 0.45$  (PE:EA = 2:1)) was isolated as a light yellow oil.  $^1\text{H}$  NMR (400 MHz,  $(\text{CD}_3)_2\text{CO}$ )  $\delta$  7.98 (dd,  $J = 7.6, 0.8$  Hz, 1H), 7.87 (d,  $J = 8.0$  Hz, 1H), 7.52–7.44 (m, 2H), 7.40–7.38 (m, 1H), 7.35–7.31 (m, 2H), 7.08 (t,  $J = 7.2$ , 1H), 3.52–3.48 (m, 2H), 3.32–3.28 (m, 2H);  $^{13}\text{C}$  NMR (100 MHz,  $(\text{CD}_3)_2\text{CO}$ )  $\delta$  169.1, 146.3, 144.5, 142.3, 132.8, 132.1, 131.7, 130.9, 127.0, 126.9, 123.0, 121.1, 120.5, 110.8, 34.8, 30.0; ESI-HRMS  $m/z$  calcd for  $\text{C}_{16}\text{H}_{13}\text{N}_2\text{O}$   $[\text{M} + \text{H}]^+$  249.1022, found 249.1023.

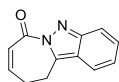

**4e** (27 mg,  $Y = 56\%$ ,  $R_f = 0.43$  (PE:EA = 1:1)) was isolated as a light yellow oil.  $^1\text{H}$  NMR (300



MHz, CDCl<sub>3</sub>)  $\delta$  7.68 (d,  $J$  = 9.0 Hz, 1H), 7.49 (d,  $J$  = 8.7 Hz, 1H), 7.32–7.27 (m, 1H), 7.07–7.01 (m, 1H), 6.99–6.93 (m, 1H), 6.45 (dt,  $J$  = 12.3, 1.5 Hz, 1H), 3.43–3.39 (m, 2H), 2.74–2.68 (m, 2H); <sup>13</sup>C NMR (100 MHz, CDCl<sub>3</sub>)  $\delta$  163.6, 150.2, 148.2, 136.4, 129.6, 125.5, 123.5, 121.0, 120.5, 119.3, 27.0, 23.3; ESI-HRMS  $m/z$  calcd for C<sub>12</sub>H<sub>11</sub>N<sub>2</sub>O [M + H]<sup>+</sup> 199.0866, found 199.0865.

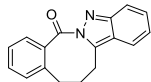

**4s** (42 mg, Y = 50% for two steps, R<sub>f</sub> = 0.1 (PE:EA = 5:1)) was isolated as a yellow oil. <sup>1</sup>H NMR (400 MHz, CDCl<sub>3</sub>)  $\delta$  7.97 (dd,  $J$  = 7.6, 1.2 Hz, 1H), 7.74 (d,  $J$  = 9.2 Hz, 1H), 7.61 (dt,  $J$  = 8.8, 1.2 Hz, 1H), 7.51 (d,  $J$  = 8.4 Hz, 1H), 7.45 (dt,  $J$  = 8.8, 1.2 Hz, 1H), 7.35–7.31 (m, 1H), 7.27–7.26 (m, 1H), 7.06–7.02 (m, 1H), 2.91 (br s, 2H), 2.70 (t,  $J$  = 6.4 Hz, 2H), 2.00–1.94 (m, 2H); <sup>13</sup>C NMR (100 MHz, (CD<sub>3</sub>)<sub>2</sub>CO)  $\delta$  166.6, 150.9, 139.8, 139.1, 135.1, 134.5, 132.6, 130.4, 130.3, 127.9, 123.8, 122.2, 122.0, 119.6, 32.1, 31.6, 21.9; ESI-HRMS  $m/z$  calcd for C<sub>17</sub>H<sub>15</sub>N<sub>2</sub>O [M + H]<sup>+</sup> 263.1179, found 263.1178.

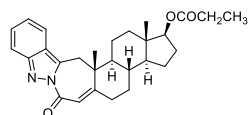

**4u** (78 mg, Y = 88% for two steps, R<sub>f</sub> = 0.40 (PE:EA = 1:1)) was isolated as a yellow oil. <sup>1</sup>H NMR (300 MHz, CDCl<sub>3</sub>)  $\delta$  7.69 (d,  $J$  = 8.7 Hz, 1H), 7.49 (d,  $J$  = 8.7 Hz, 1H), 7.32–7.27 (m, 1H), 7.08–7.03 (m, 1H), 6.28 (s, 1H), 4.63 (t,  $J$  = 8.1 Hz, 1H), 3.59 (d,  $J$  = 15.0 Hz, 1H), 3.12 (d,  $J$  = 15.0 Hz, 1H), 2.58–2.39 (m, 2H), 2.34 (q,  $J$  = 7.5 Hz, 2H), 2.27–2.14 (m, 1H), 1.96–1.81 (m, 3H), 1.74–1.49 (m, 4H), 1.45–1.33 (m, 1H), 1.30–1.06 (m, 3H), 1.15 (t,  $J$  = 7.5 Hz, 4H), 1.01 (s, 3H), 0.87 (s, 3H); <sup>13</sup>C NMR (100 MHz, CDCl<sub>3</sub>)  $\delta$  174.5, 169.8, 163.2, 150.2, 133.2, 129.2, 123.4, 122.3, 120.1, 119.3, 119.2, 82.1, 51.8, 50.5, 43.5, 42.6, 36.8, 36.6, 35.6, 33.7, 31.8, 27.8, 27.7, 23.5, 21.7, 18.7, 12.2, 9.3; ESI-HRMS  $m/z$  calcd for C<sub>28</sub>H<sub>35</sub>N<sub>2</sub>O<sub>3</sub> [M + H]<sup>+</sup> 447.2642, found 447.2641.

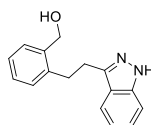

**5d** (13 mg, Y = 68%, R<sub>f</sub> = 0.5 (PE:EA = 1:1)) was isolated as a white solid; mp 132–133 °C. <sup>1</sup>H NMR (400 MHz, CD<sub>3</sub>OD)  $\delta$  7.62 (d,  $J$  = 8.0 Hz, 1H), 7.45 (d,  $J$  = 8.4 Hz, 1H), 7.35–7.31 (m, 2H), 7.17–7.15 (m, 3H), 7.06 (t,  $J$  = 7.2 Hz, 1H), 4.63 (s, 2H), 3.28–3.24 (m, 2H), 3.17–3.13 (m, 2H); <sup>13</sup>C NMR (100 MHz, CD<sub>3</sub>OD)  $\delta$  147.2, 142.8, 141.1, 140.1, 130.7, 129.7, 128.9, 127.9, 127.5, 123.1, 121.3, 121.3, 111.2, 63.2, 33.4, 29.9; ESI-HRMS  $m/z$  calcd for C<sub>16</sub>H<sub>17</sub>N<sub>2</sub>O [M + H]<sup>+</sup> 253.1335, found 253.1334.

## 6. NMR spectra

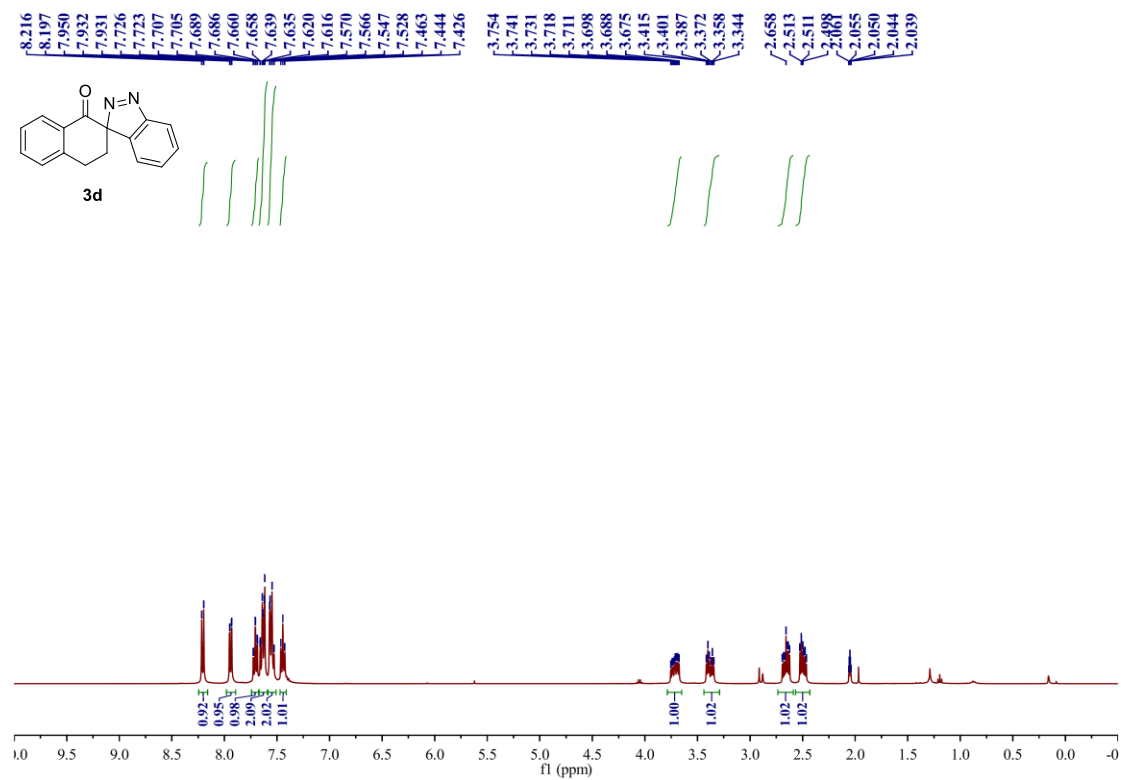

**Fig. S1.** <sup>1</sup>H NMR of compound **3d** (400 MHz, (CD<sub>3</sub>)<sub>2</sub>CO).

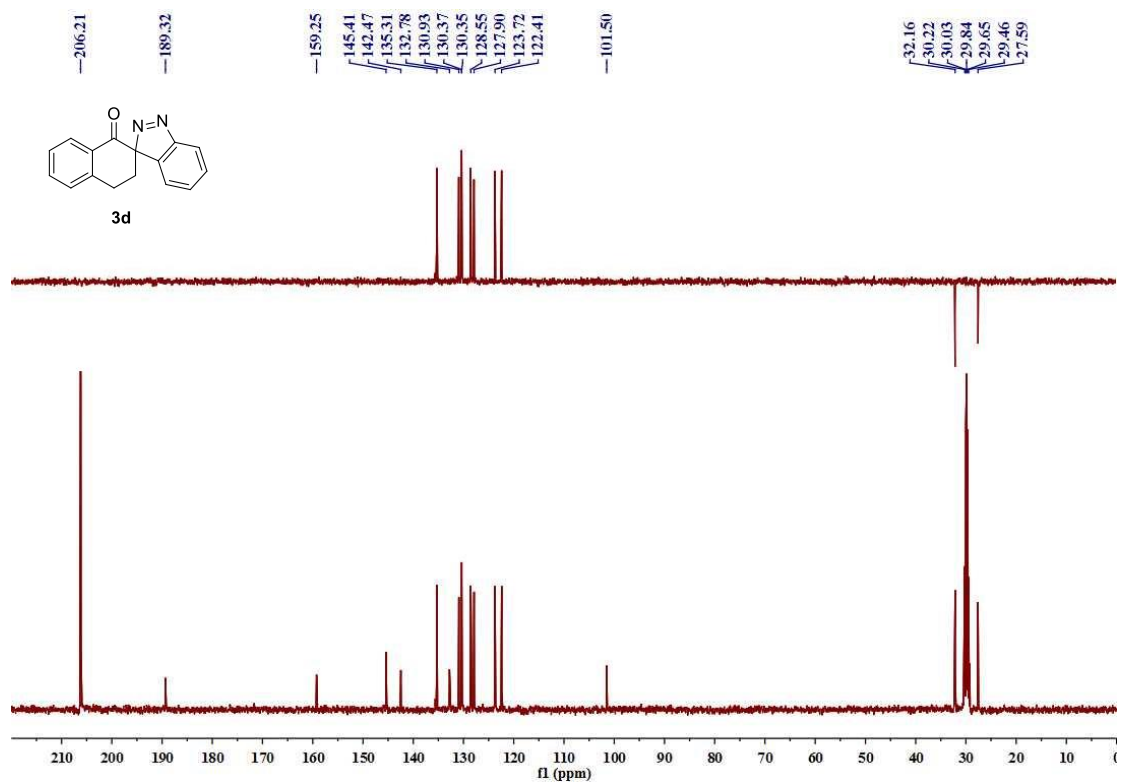

**Fig. S2.** <sup>13</sup>C and DEPT-135 NMR of compound **3d** (100 MHz, (CD<sub>3</sub>)<sub>2</sub>CO).

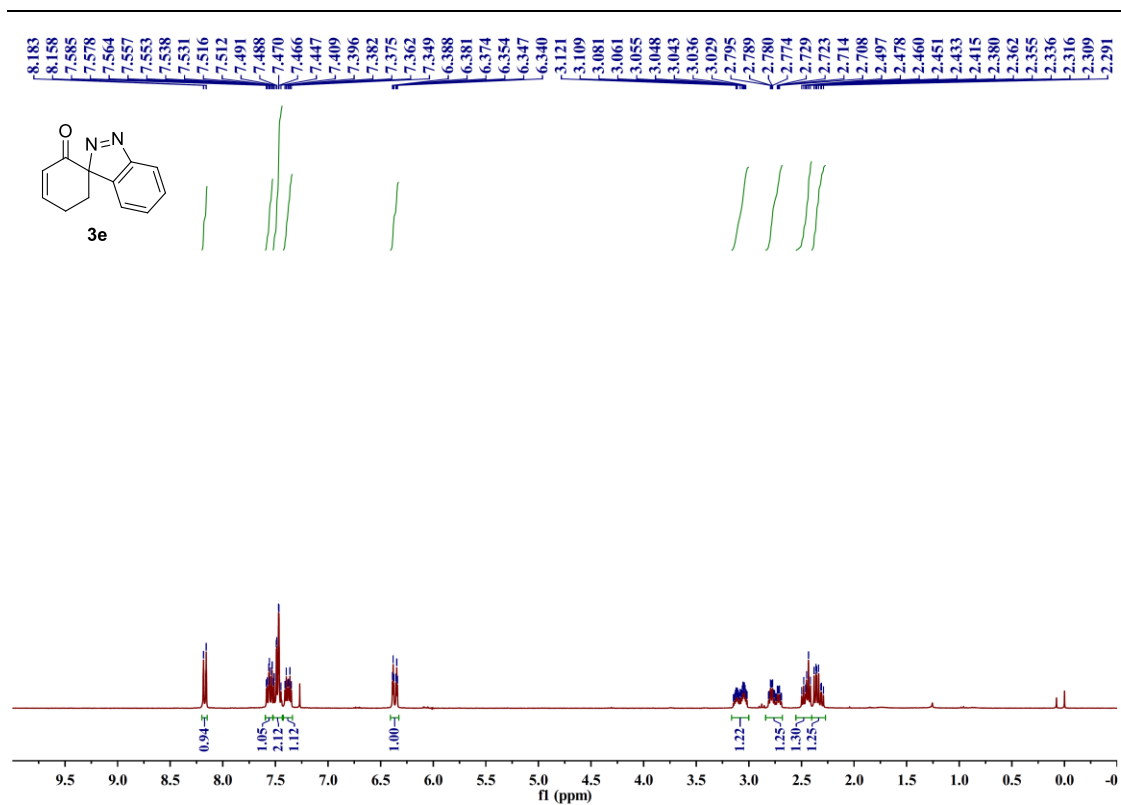

**Fig. S3.** <sup>1</sup>H NMR of compound **3e** (300 MHz, CDCl<sub>3</sub>).

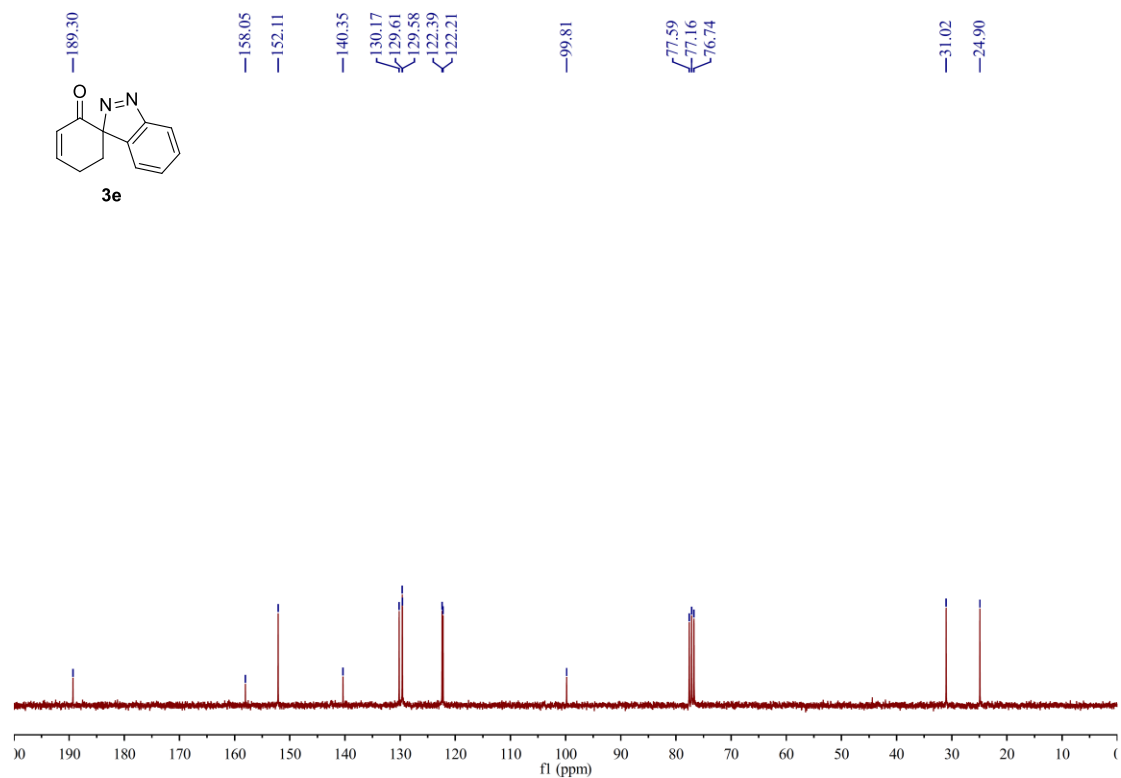

**Fig. S4.** <sup>13</sup>C NMR of compound **3e** (75 MHz, CDCl<sub>3</sub>).

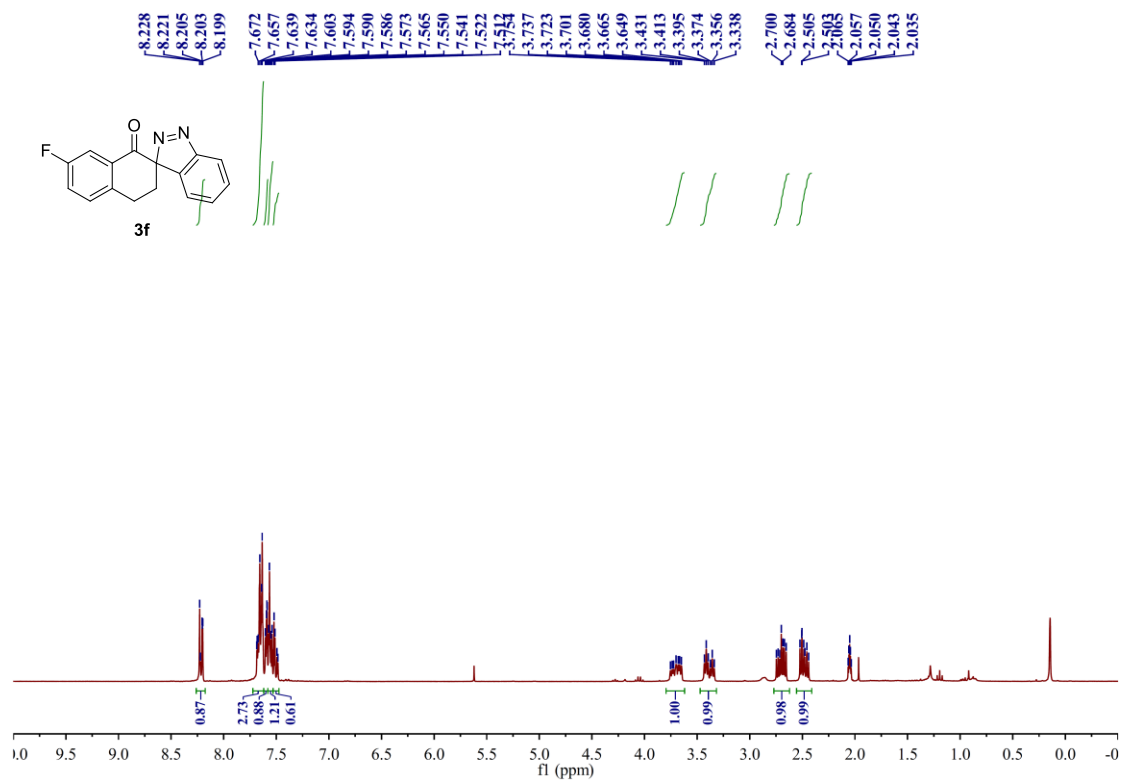

**Fig. S5**  $^1\text{H}$  NMR of compound **3f** (300 MHz,  $(\text{CD}_3)_2\text{CO}$ ).

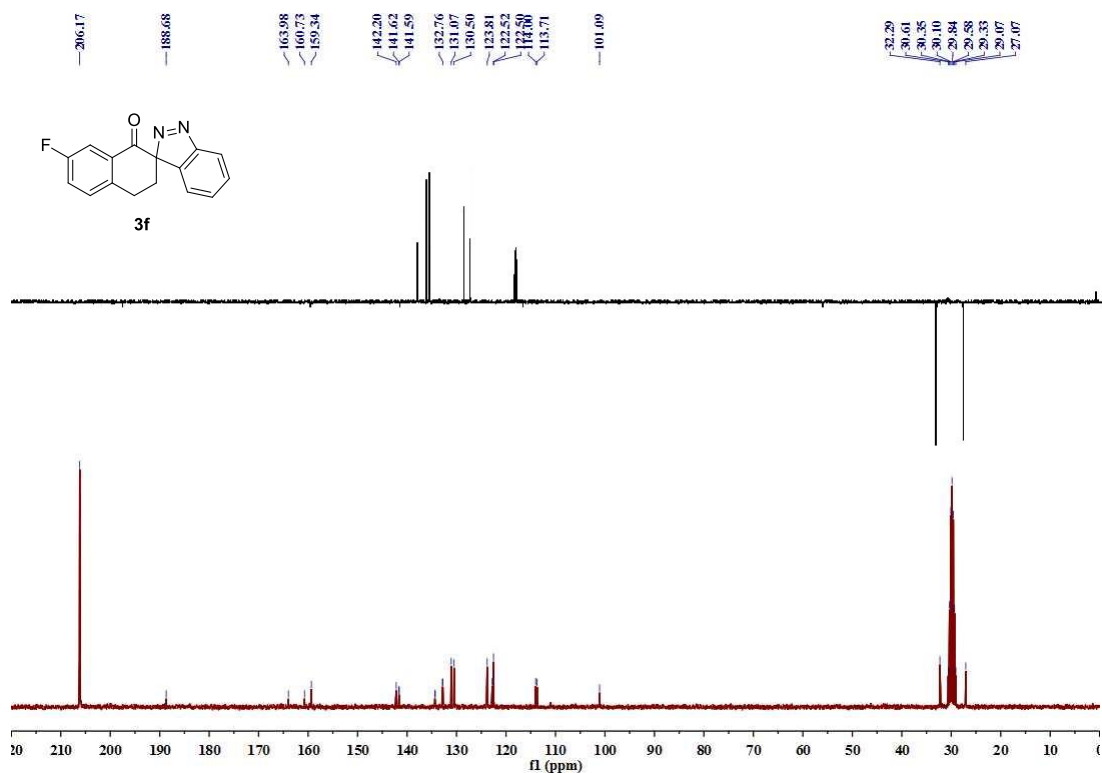

**Fig. S6.**  $^{13}\text{C}$  and DEPT-135 NMR of compound **3f** (75 MHz,  $(\text{CD}_3)_2\text{CO}$ ).

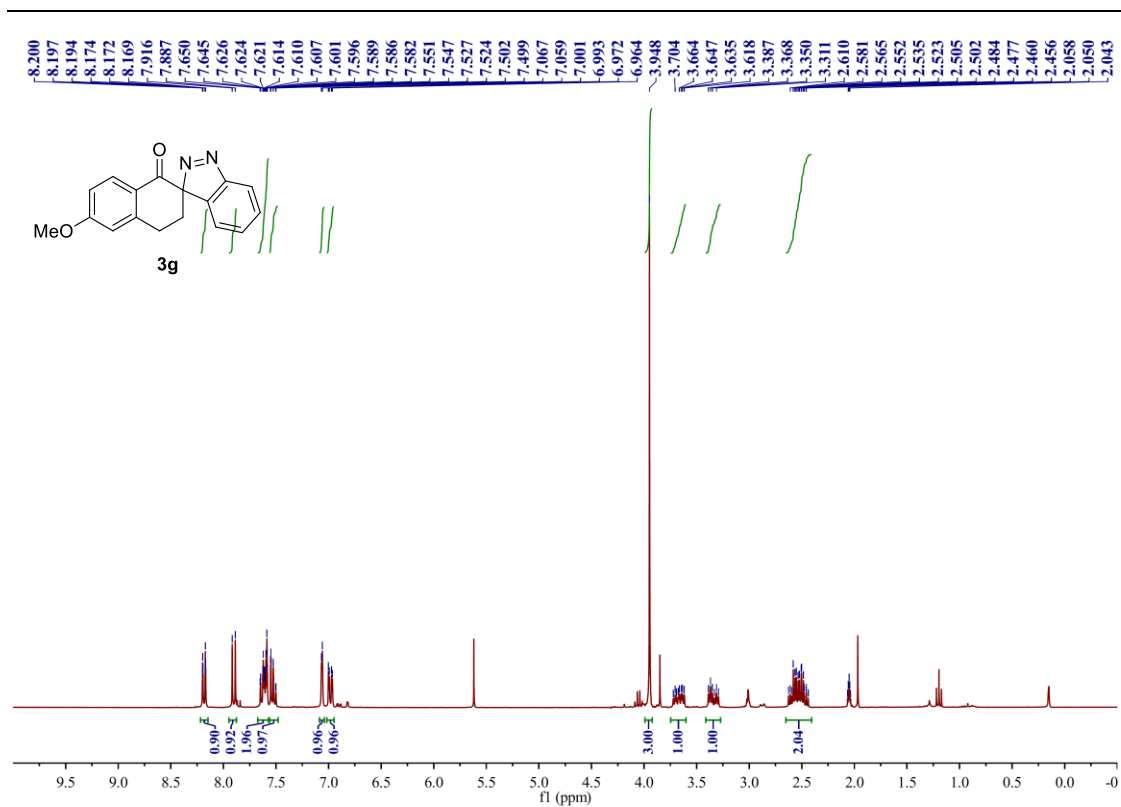

Fig. S7. <sup>1</sup>H NMR of compound **3g** (300 MHz, (CD<sub>3</sub>)<sub>2</sub>CO).

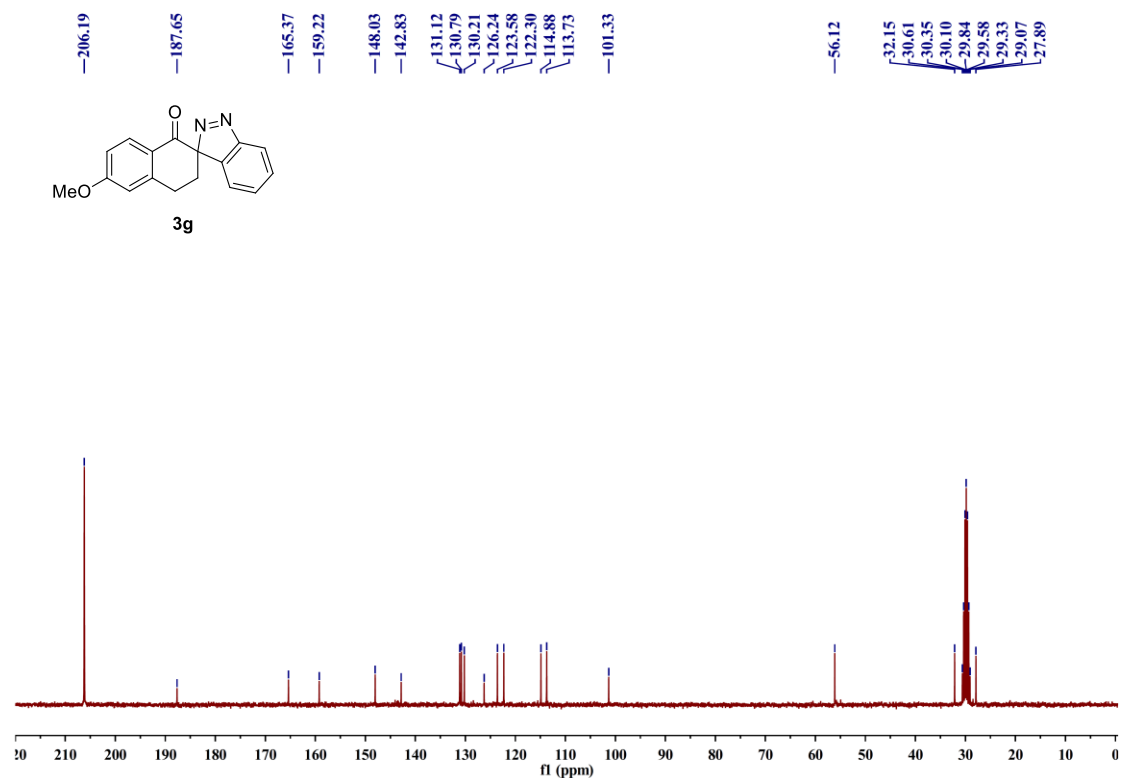

Fig. S8. <sup>13</sup>C NMR of compound **3g** (75 MHz, (CD<sub>3</sub>)<sub>2</sub>CO).

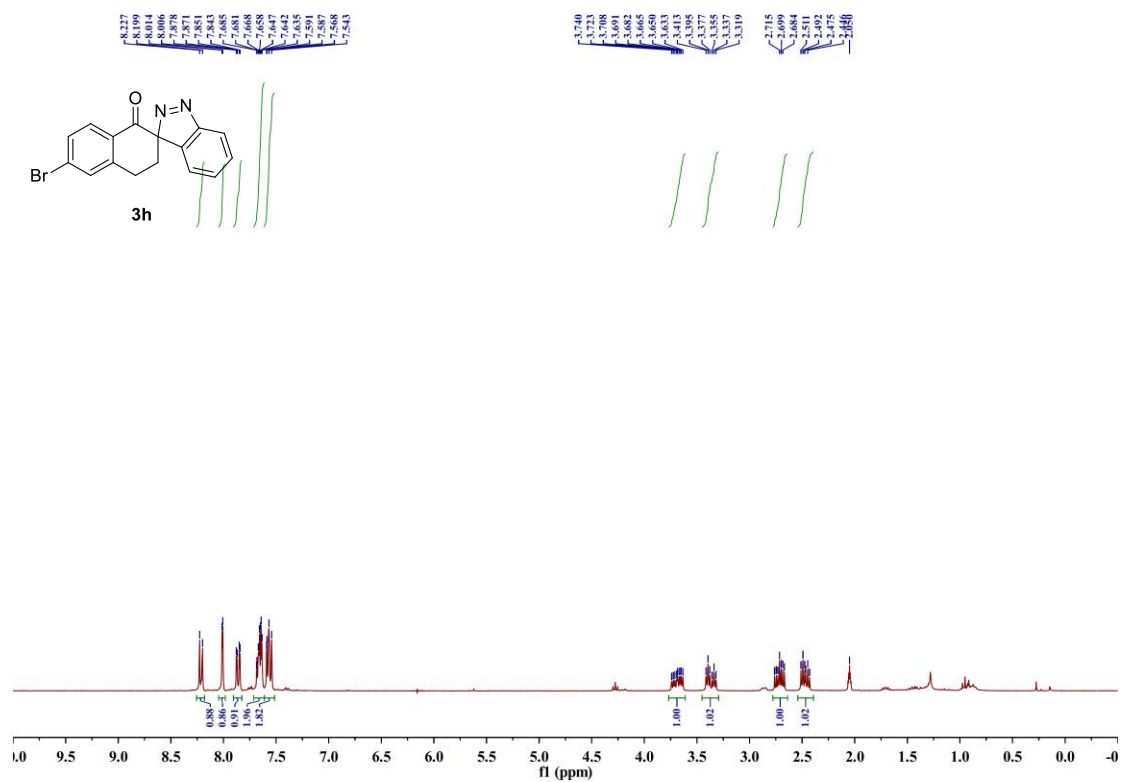

**Fig. S9.**  $^1\text{H}$  NMR of compound **3h** (300 MHz,  $(\text{CD}_3)_2\text{CO}$ ).

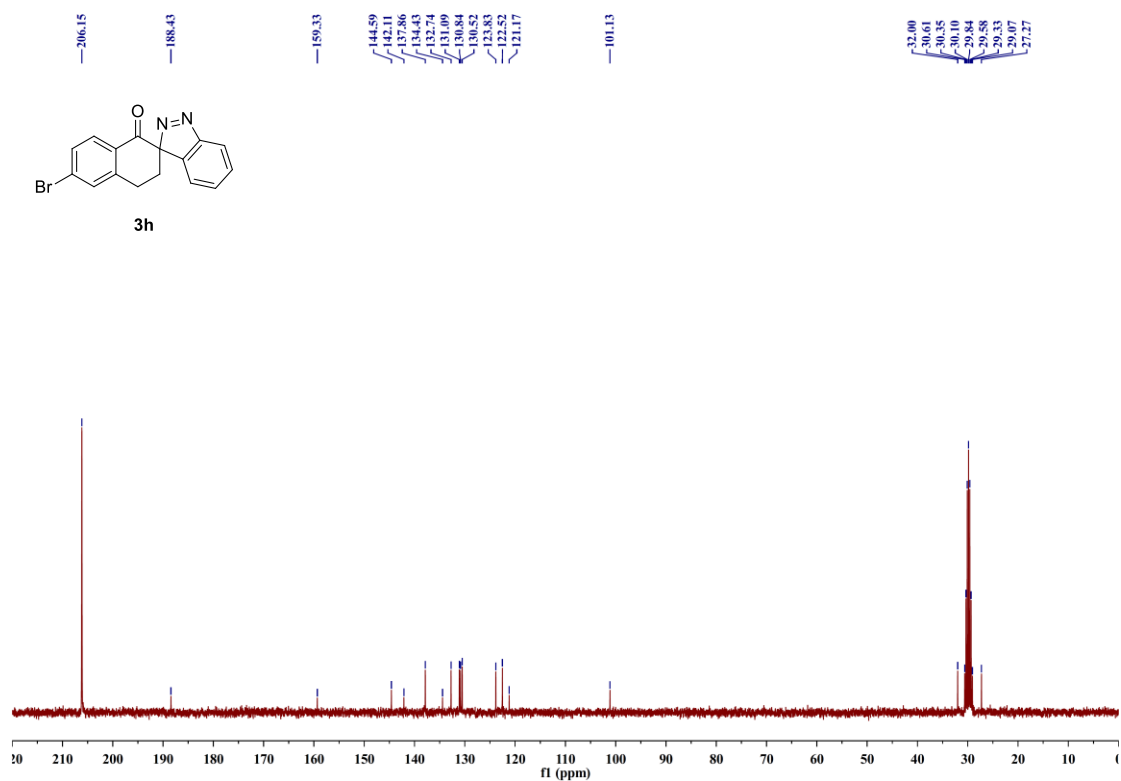

**Fig. S10.**  $^{13}\text{C}$  NMR of compound **3h** (75 MHz,  $(\text{CD}_3)_2\text{CO}$ ).

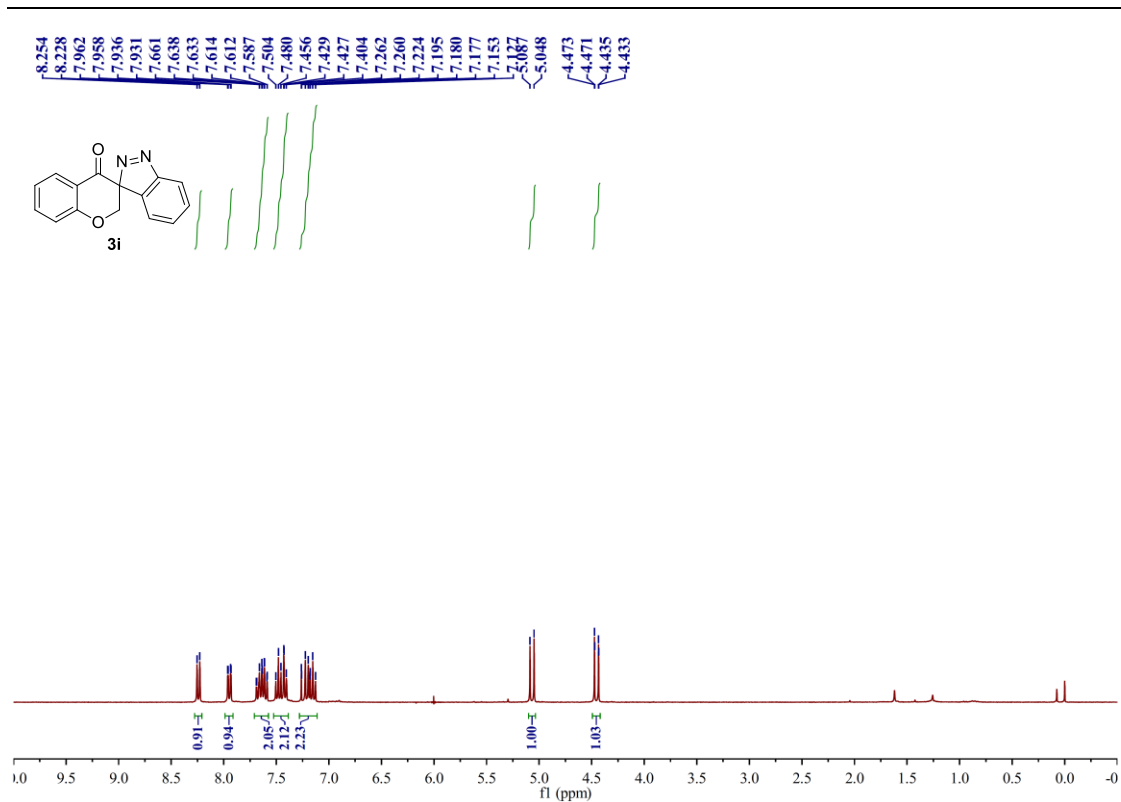

**Fig. S11.** <sup>1</sup>H NMR of compound **3i** (300 MHz, CDCl<sub>3</sub>).

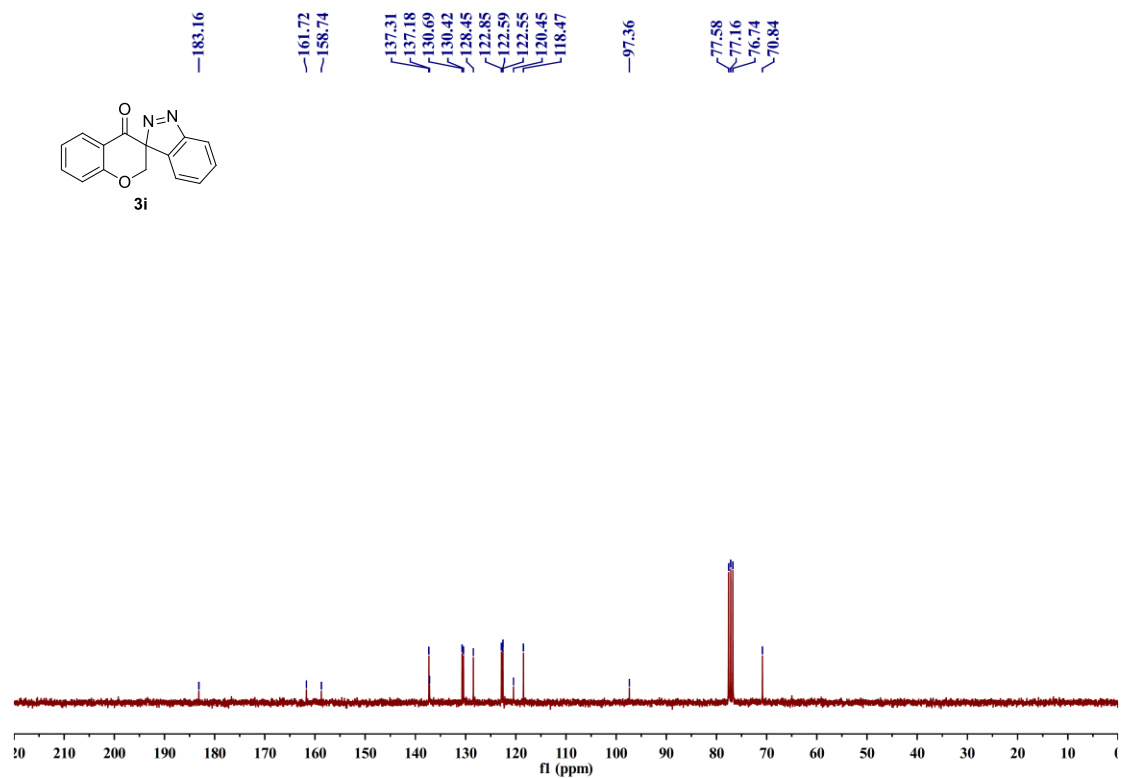

**Fig. S12.** <sup>13</sup>C NMR of compound **3i** (75 MHz, CDCl<sub>3</sub>).

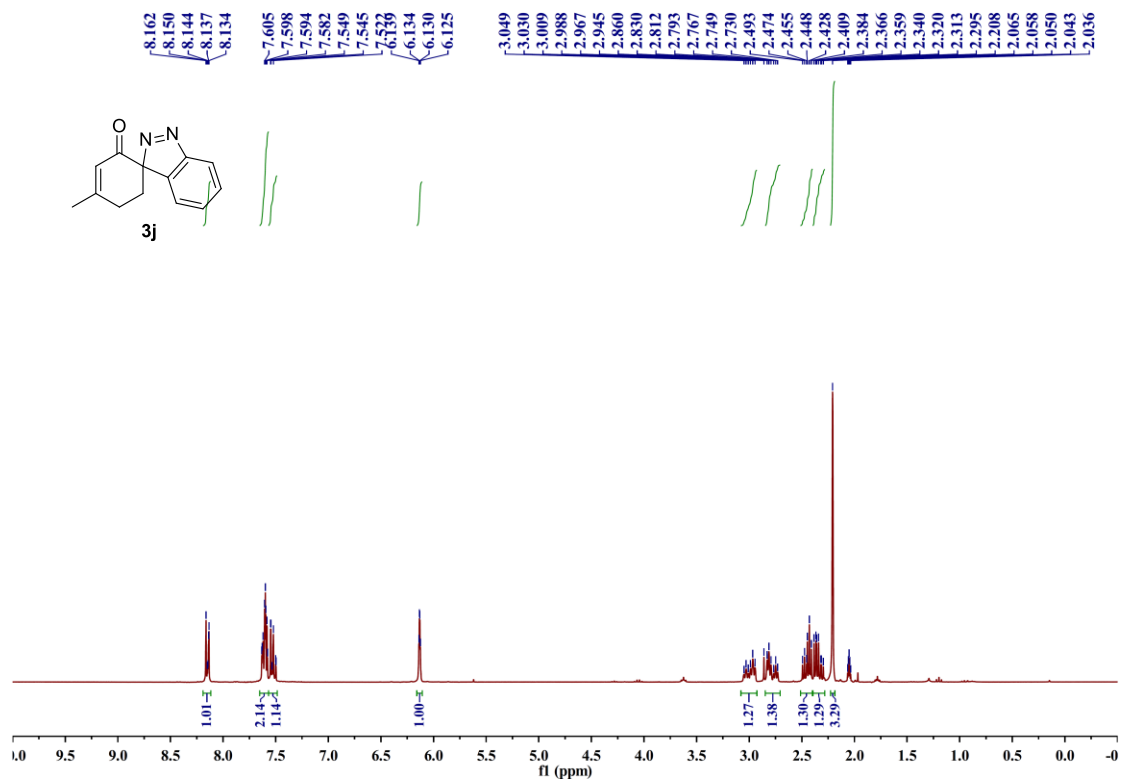

**Fig. S13.** <sup>1</sup>H NMR of compound **3j** (300 MHz, (CD<sub>3</sub>)<sub>2</sub>CO).

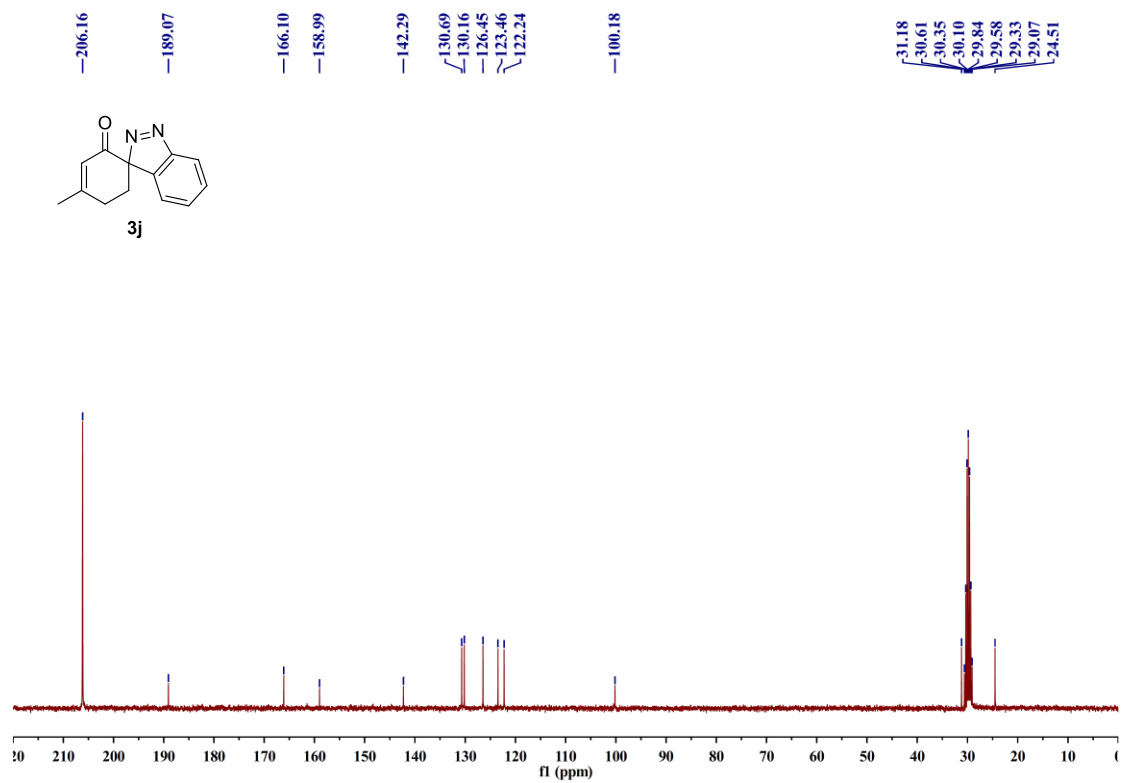

**Fig. S14.** <sup>13</sup>C NMR of compound **3j** (75 MHz, (CD<sub>3</sub>)<sub>2</sub>CO).



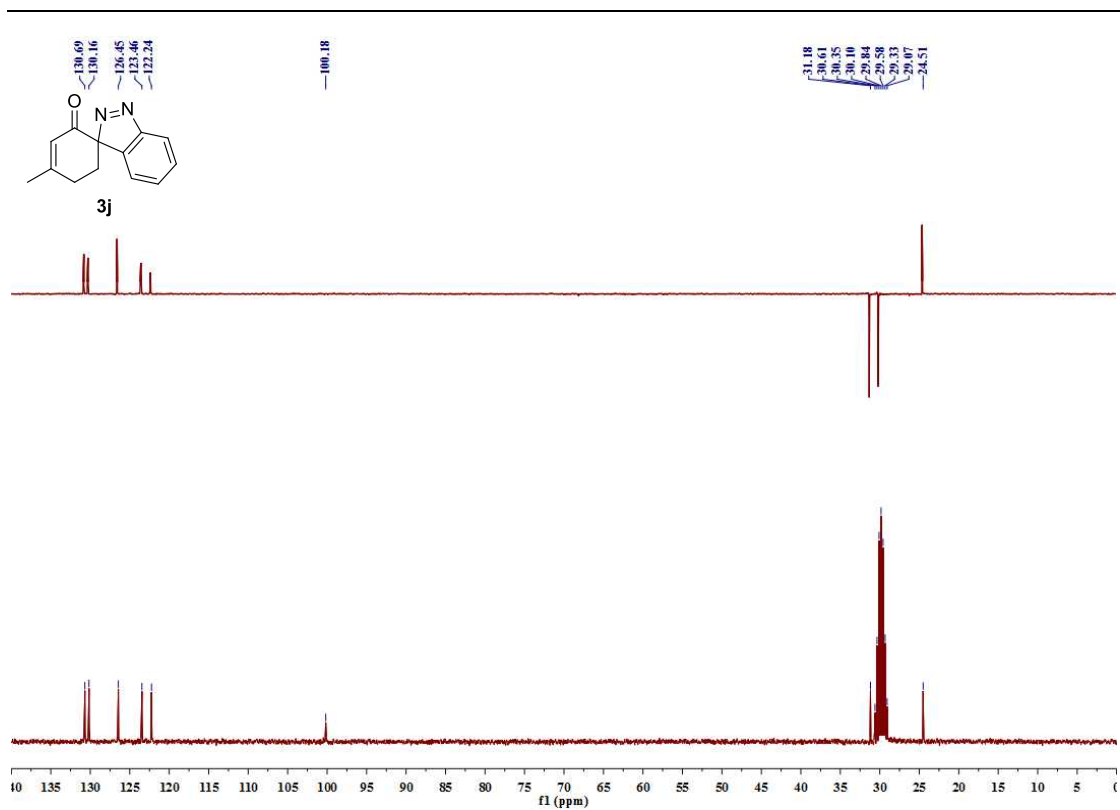

**Fig. S15.**  $^{13}\text{C}$  and DEPT-135 NMR of compound **3j** (75 MHz,  $(\text{CD}_3)_2\text{CO}$ )

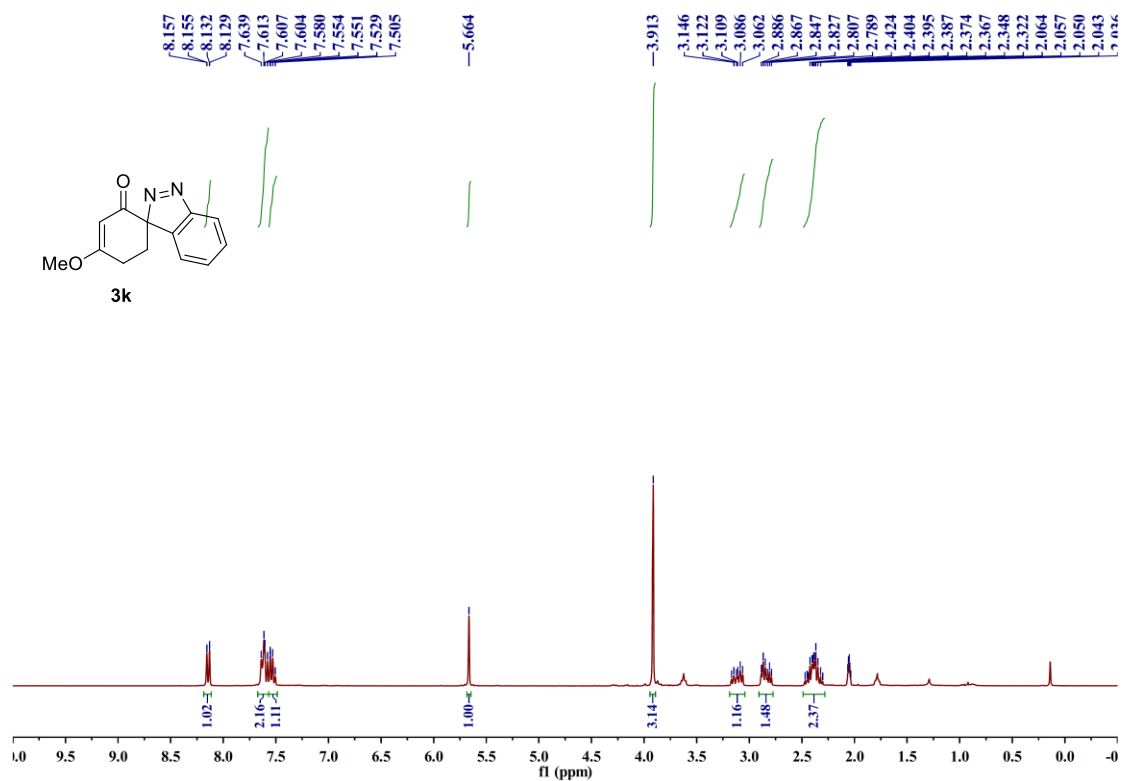

**Fig. S16.**  $^1\text{H}$  NMR of compound **3k** (300 MHz,  $(\text{CD}_3)_2\text{CO}$ ).

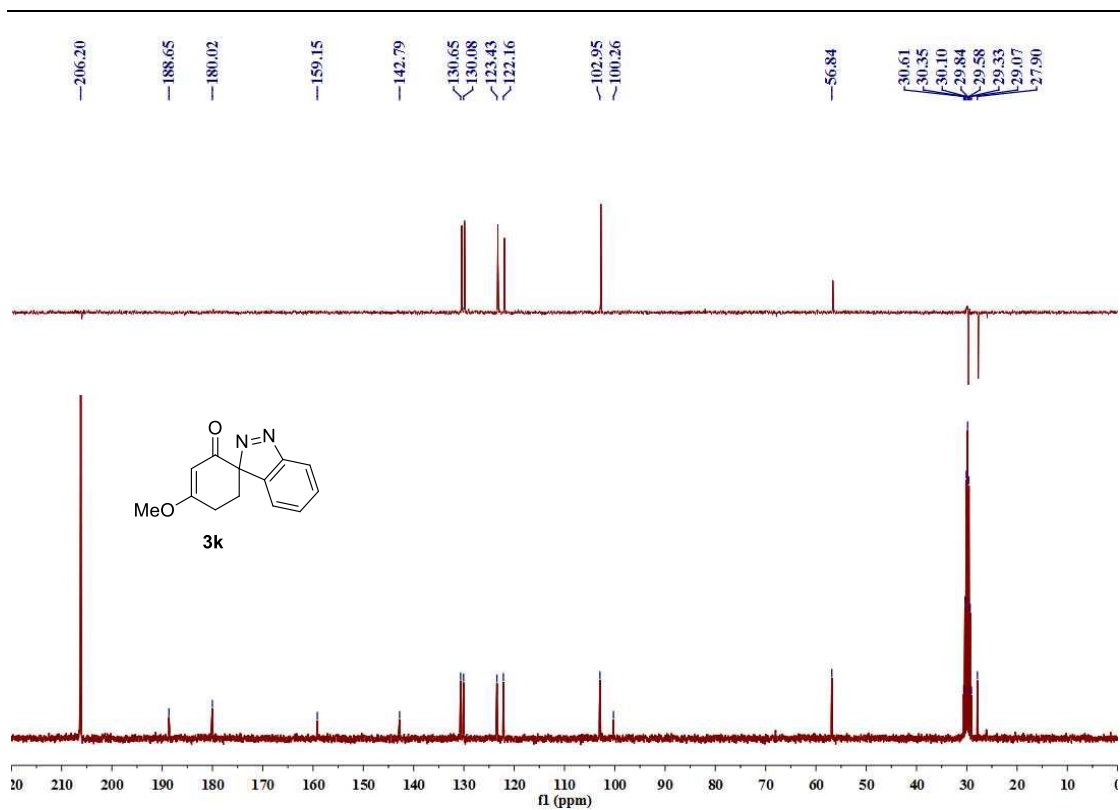

**Fig. S17.** <sup>13</sup>C and DEPT-135 NMR of compound **3k** (75 MHz, (CD<sub>3</sub>)<sub>2</sub>CO).

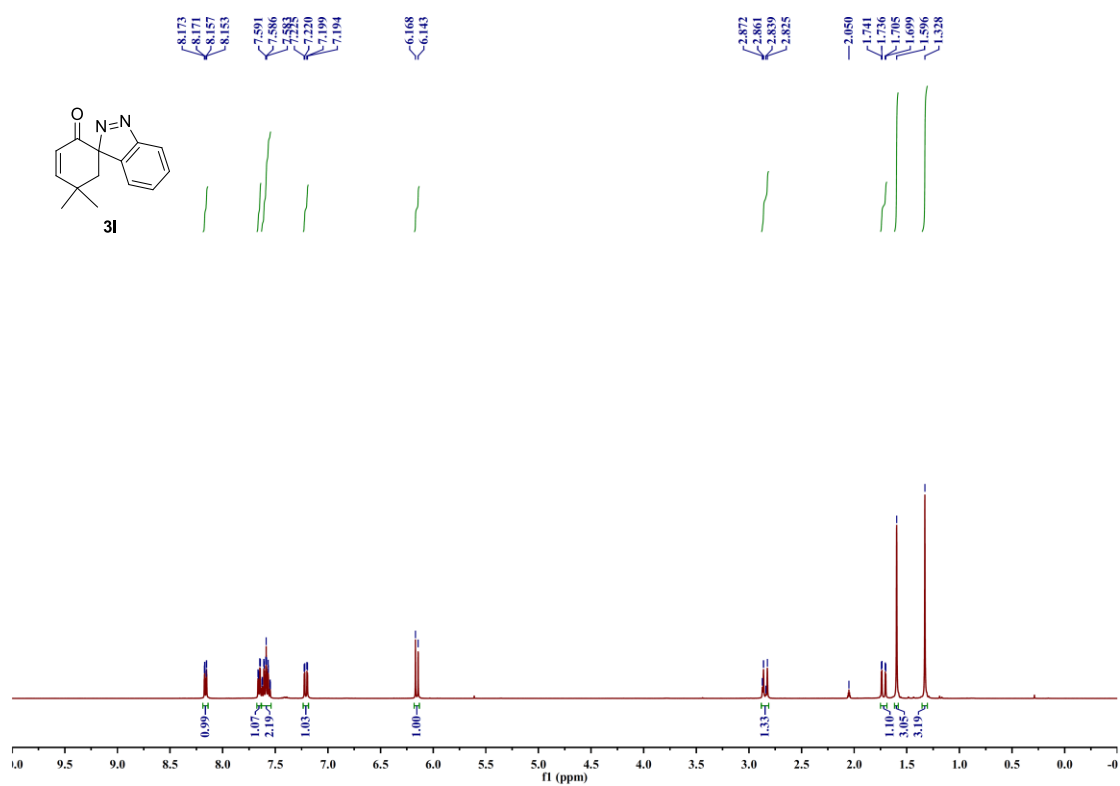

**Fig. S18.** <sup>1</sup>H NMR of compound **3l** (400 MHz, (CD<sub>3</sub>)<sub>2</sub>CO).

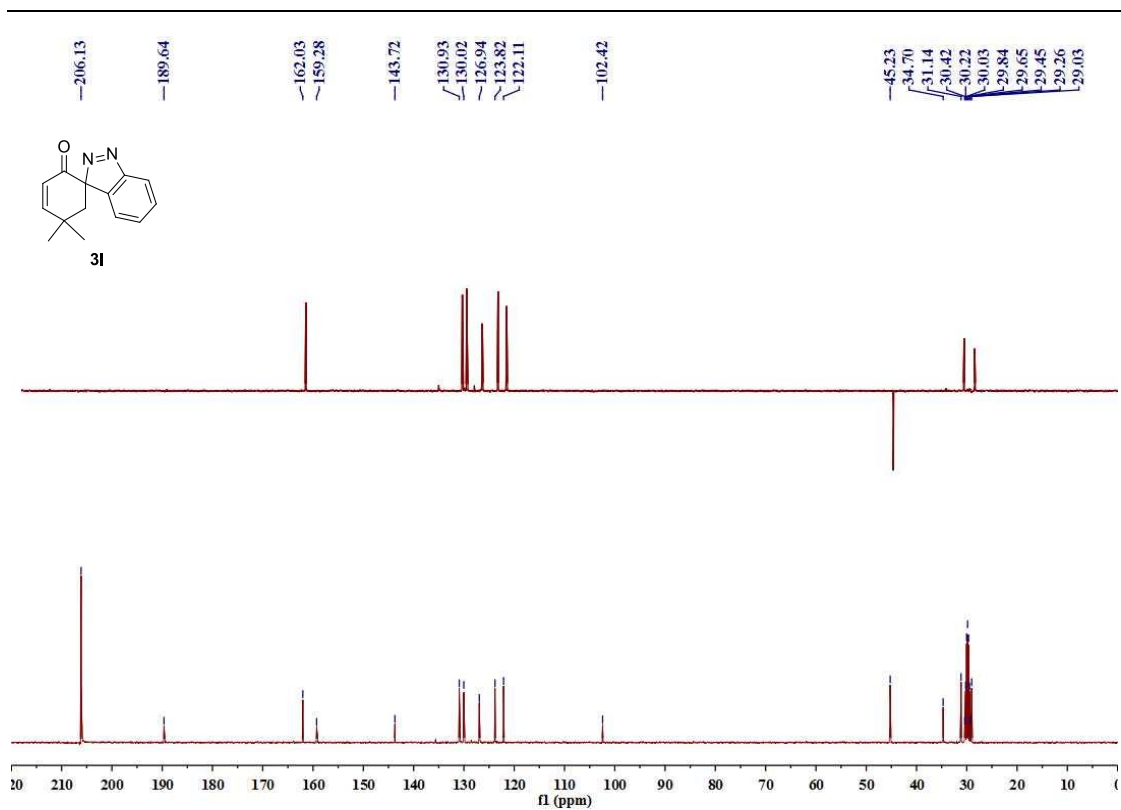

**Fig. S19.** <sup>13</sup>C and DEPT-135 NMR of compound **3l** (100 MHz, (CD<sub>3</sub>)<sub>2</sub>CO).

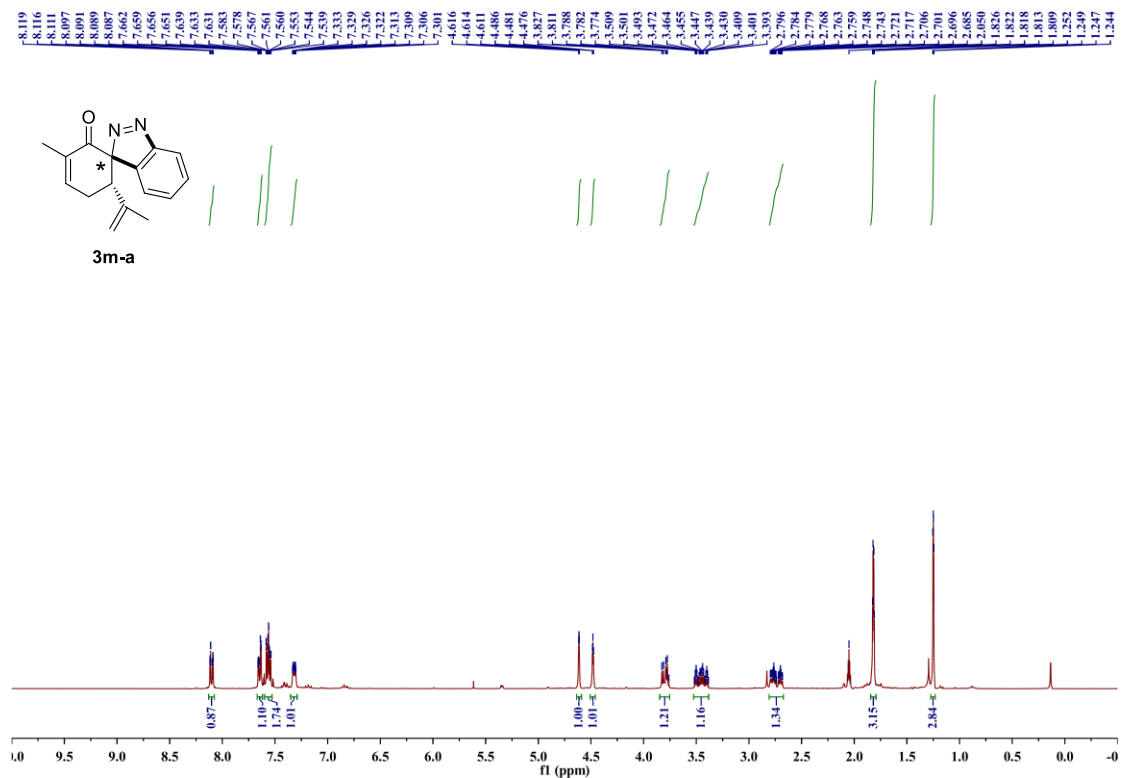

**Fig. S20.** <sup>1</sup>H NMR of compound **3m-a** (300 MHz, (CD<sub>3</sub>)<sub>2</sub>CO).

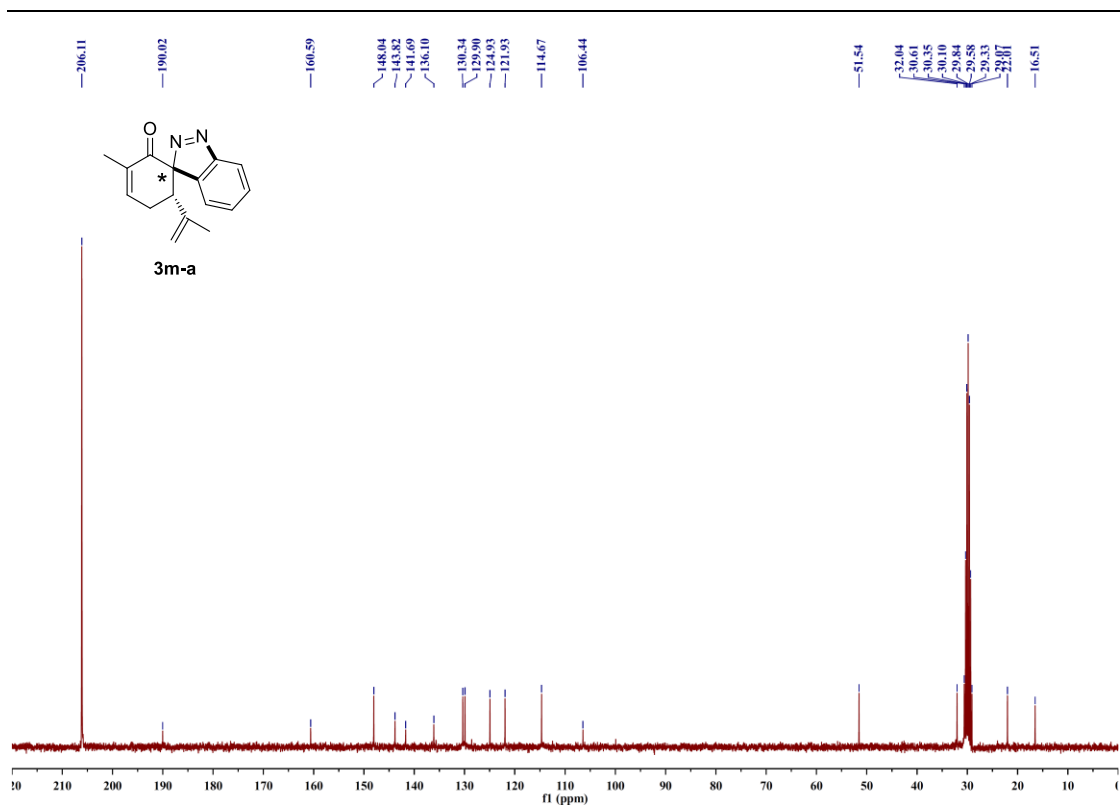

**Fig. S21.** <sup>13</sup>C NMR of compound **3m-a** (75 MHz, (CD<sub>3</sub>)<sub>2</sub>CO).

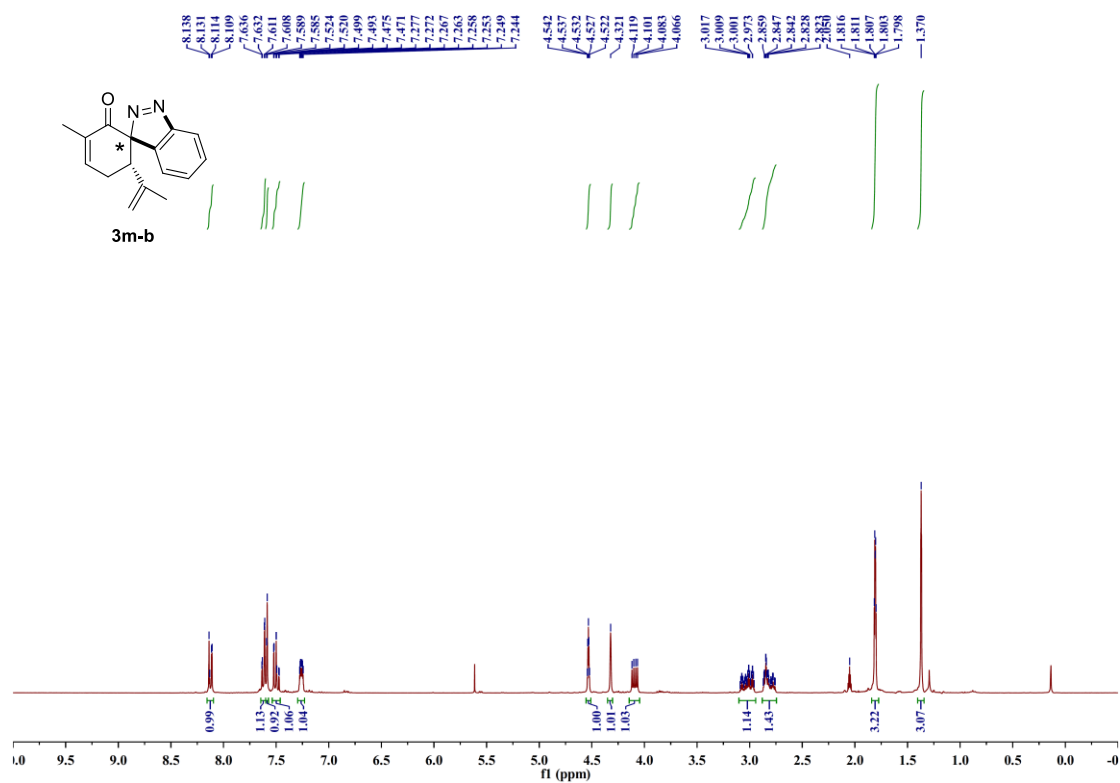

**Fig. S22.** <sup>1</sup>H NMR of compound **3m-b** (300 MHz, (CD<sub>3</sub>)<sub>2</sub>CO).

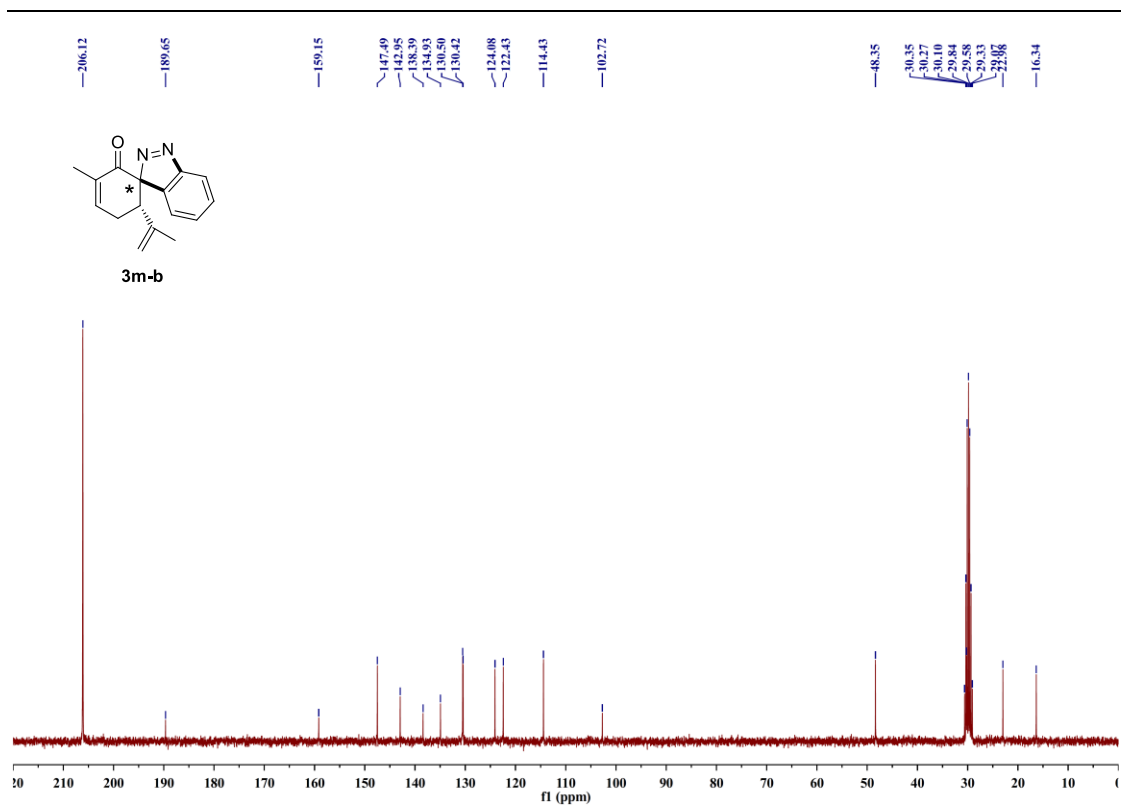

**Fig. S23.**  $^{13}\text{C}$  NMR of compound **3m-b** (75 MHz,  $(\text{CD}_3)_2\text{CO}$ ).

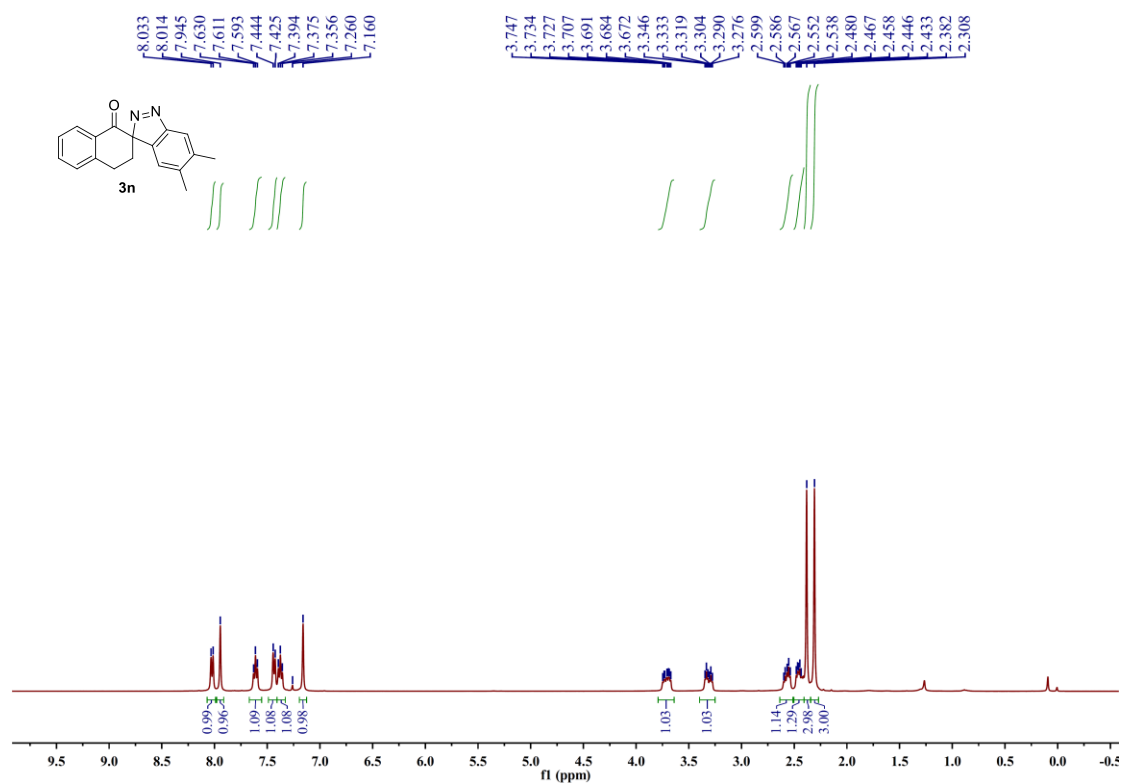

**Fig. S24.**  $^1\text{H}$  NMR of compound **3n** (400 MHz,  $\text{CDCl}_3$ ).

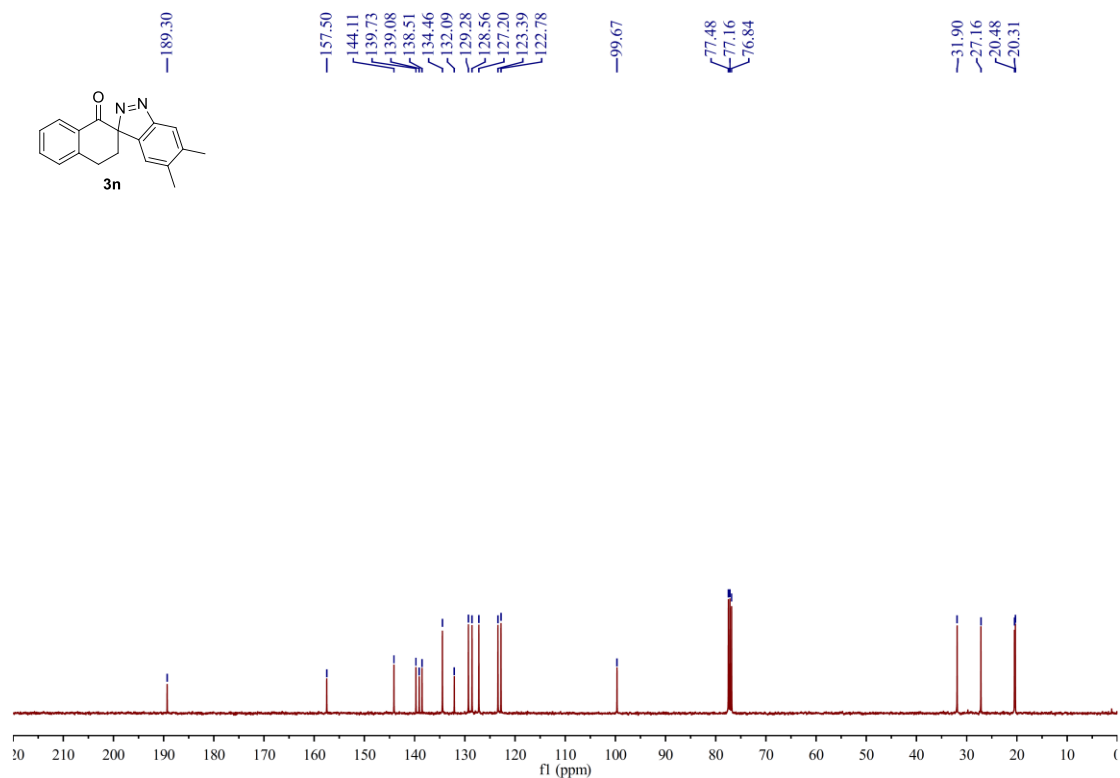

**Fig. S25.**  $^{13}\text{C}$  NMR of compound **3n** (100 MHz,  $\text{CDCl}_3$ ).

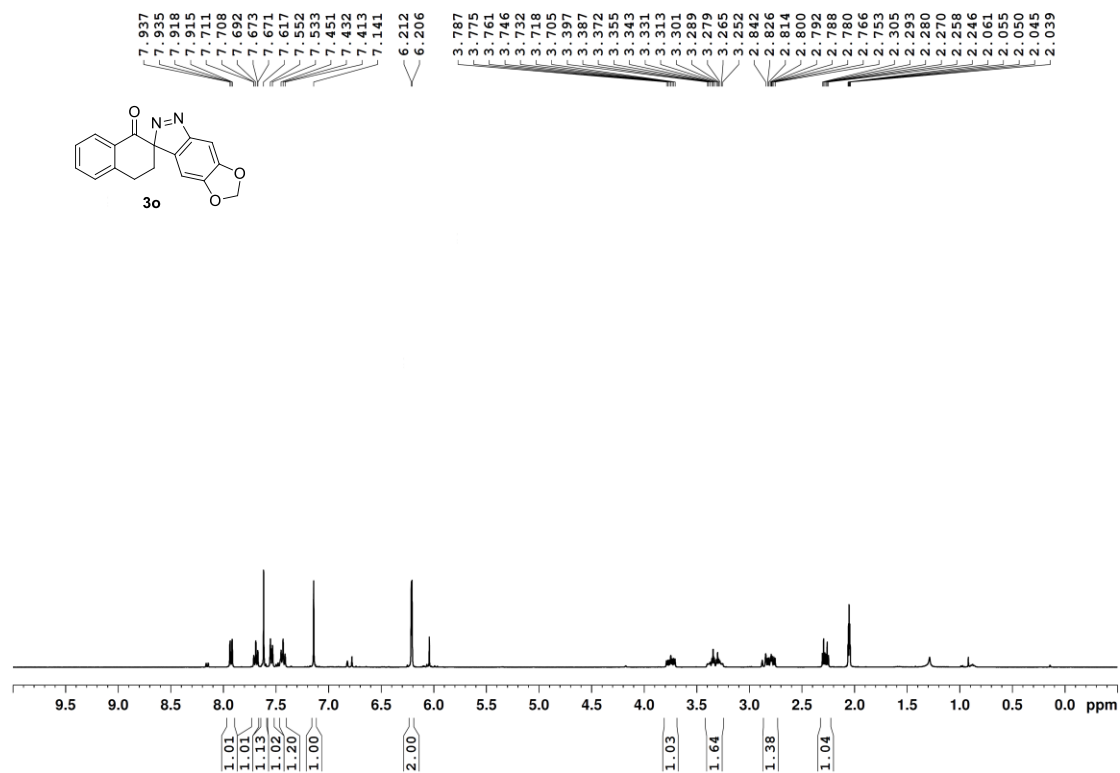

**Fig. S26.**  $^1\text{H}$  NMR of compound **3o** (400 MHz,  $(\text{CD}_3)_2\text{CO}$ ).

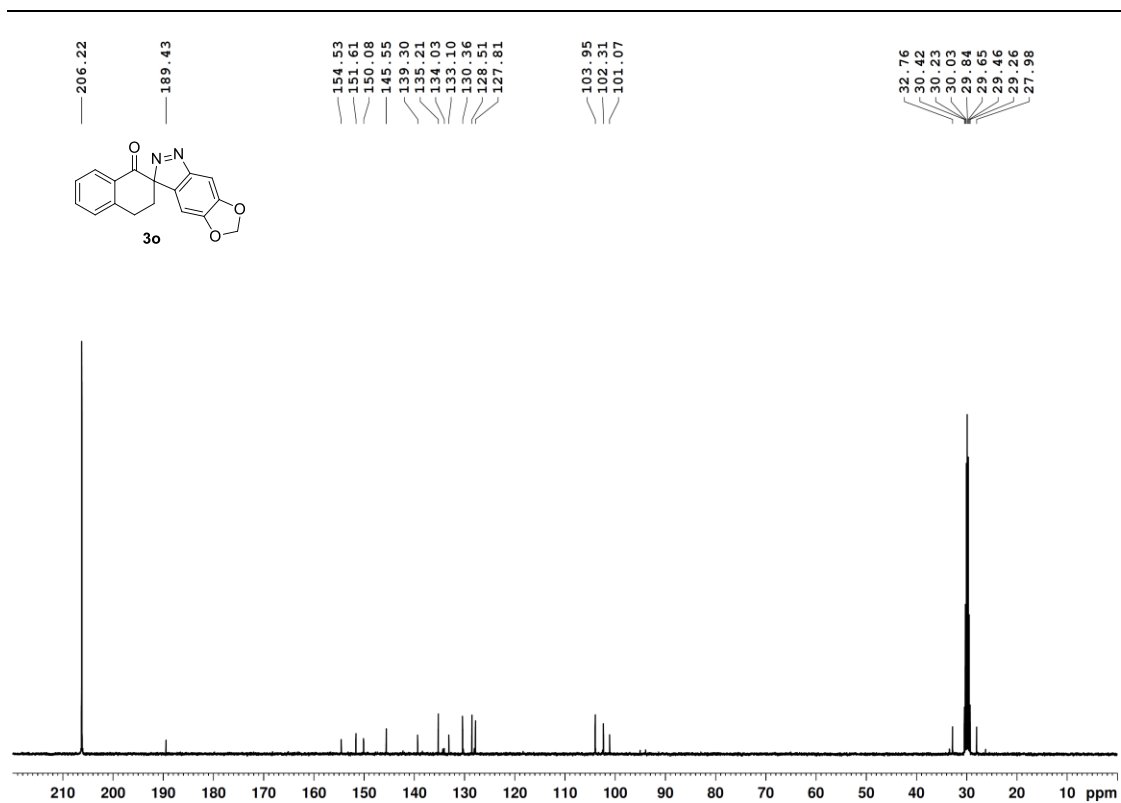

**Fig. S27.**  $^{13}\text{C}$  NMR of compound **3o** (100 MHz,  $(\text{CD}_3)_2\text{CO}$ ).

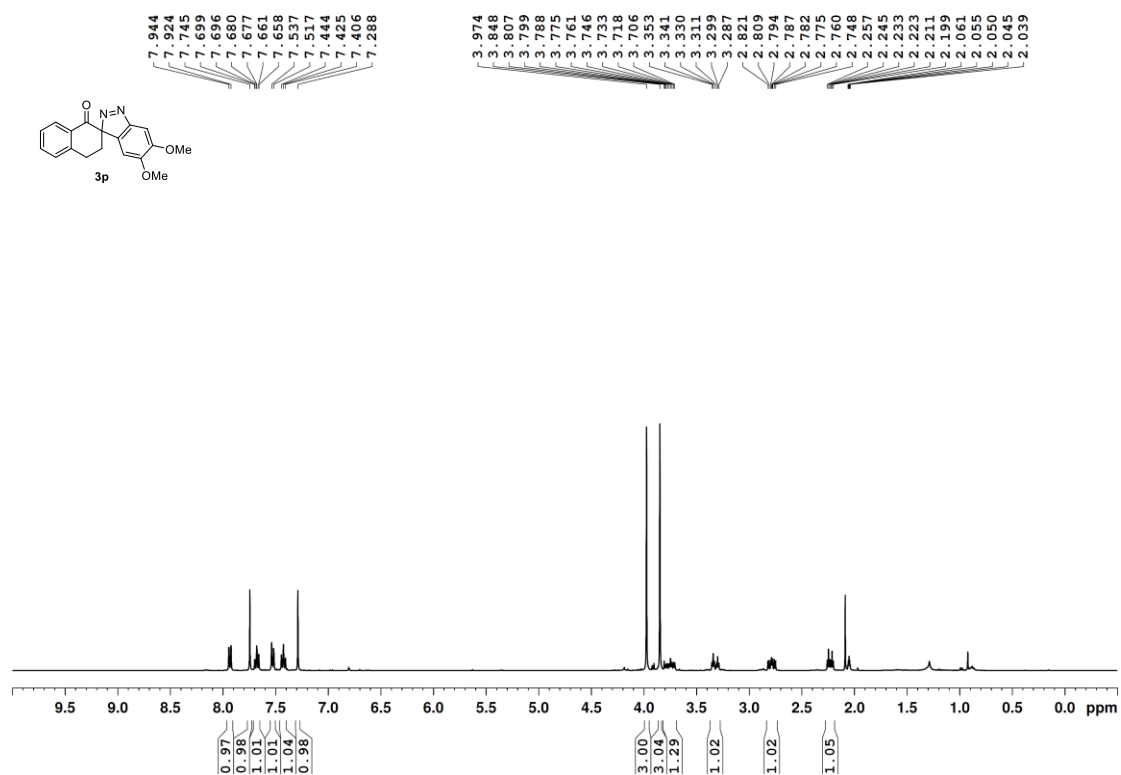

**Fig. S28.**  $^1\text{H}$  NMR of compound **3p** (400 MHz,  $(\text{CD}_3)_2\text{CO}$ ).

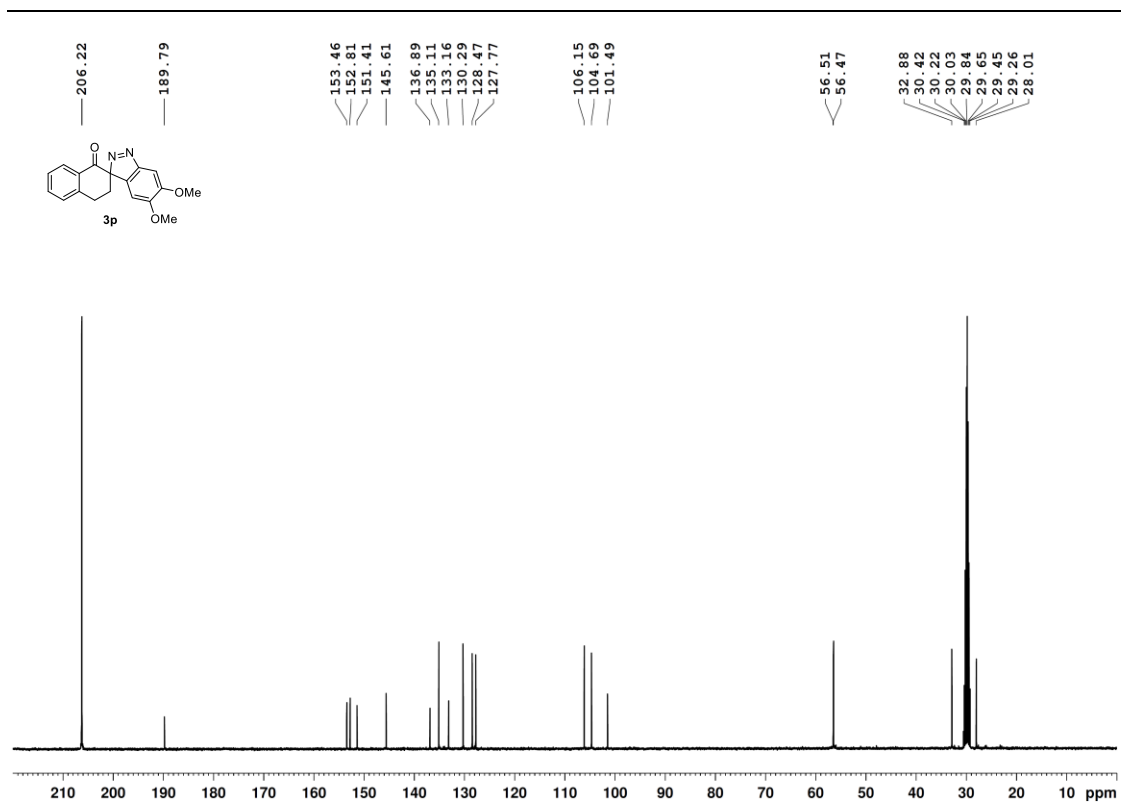

Fig. S29.  $^{13}\text{C}$  NMR of compound **3p** (100 MHz,  $(\text{CD}_3)_2\text{CO}$ ).

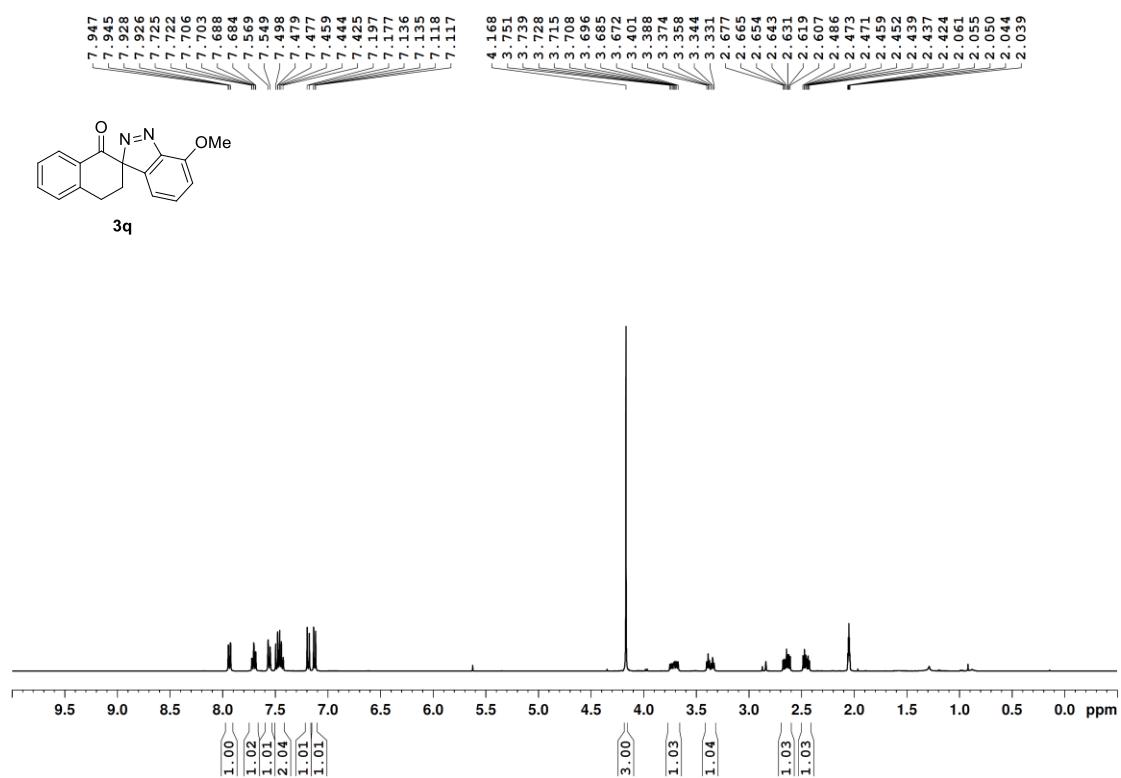

Fig. S30.  $^1\text{H}$  NMR of compound **3q** (400 MHz,  $(\text{CD}_3)_2\text{CO}$ ).



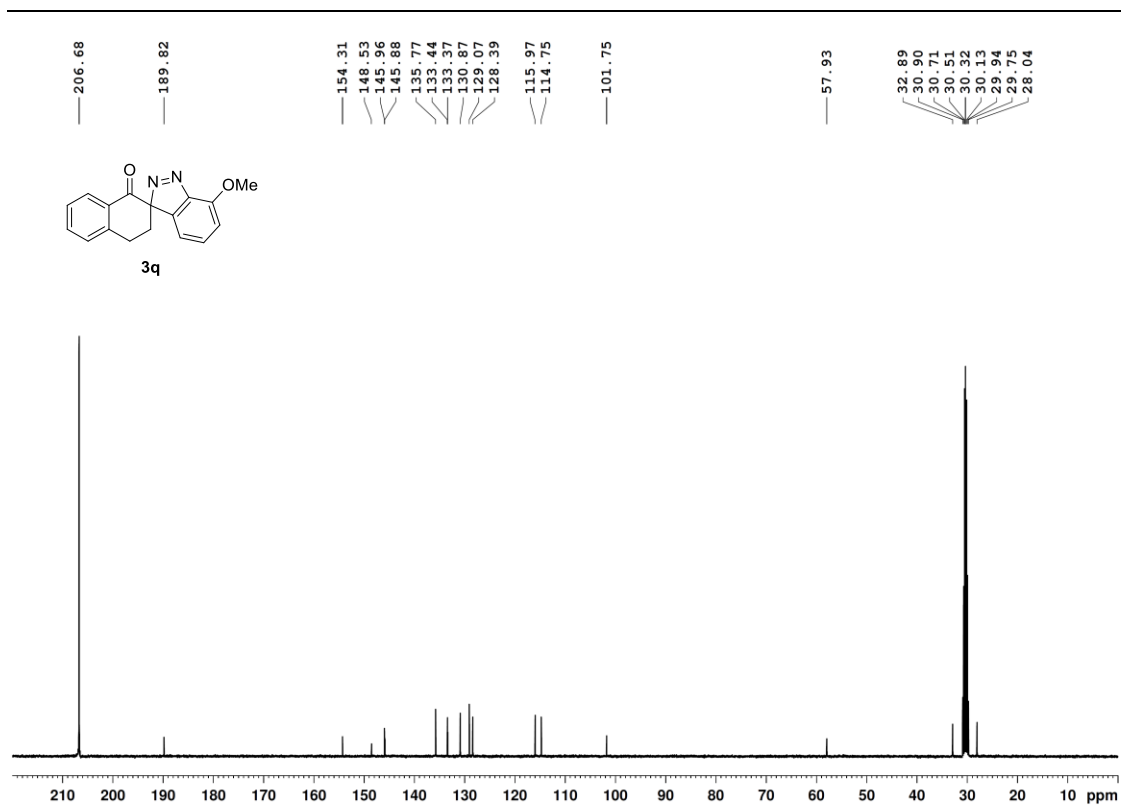

**Fig. S31.**  $^{13}\text{C}$  NMR of compound **3q** (100 MHz,  $(\text{CD}_3)_2\text{CO}$ ).

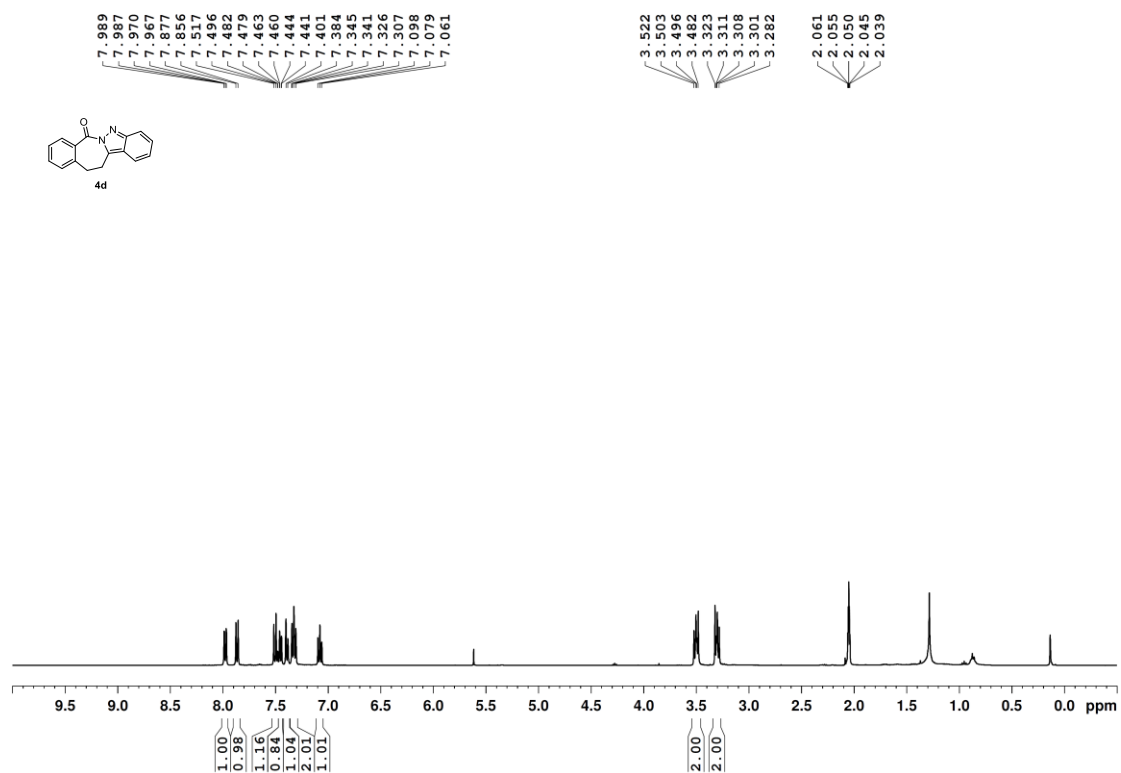

**Fig. S32.**  $^1\text{H}$  NMR of compound **4d** (400 MHz,  $(\text{CD}_3)_2\text{CO}$ ).

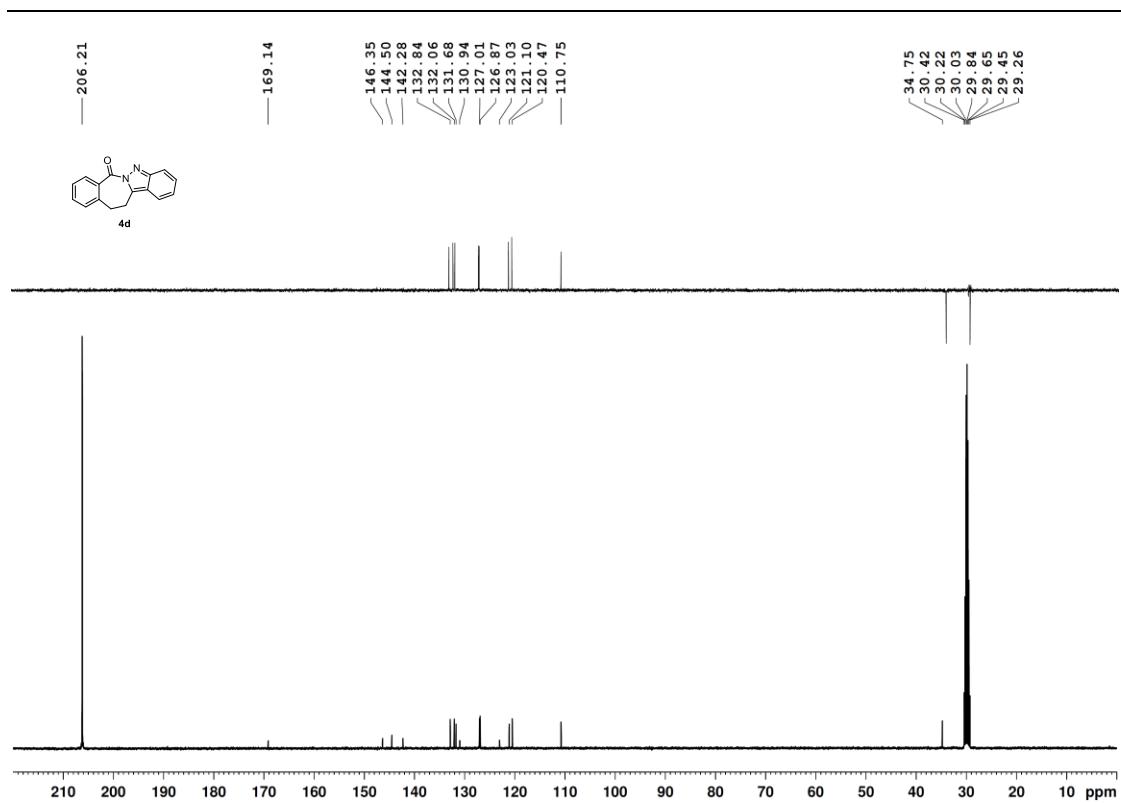

**Fig. S33.** <sup>13</sup>C and DEPT-135 NMR of compound **4d** (100 MHz, (CD<sub>3</sub>)<sub>2</sub>CO).

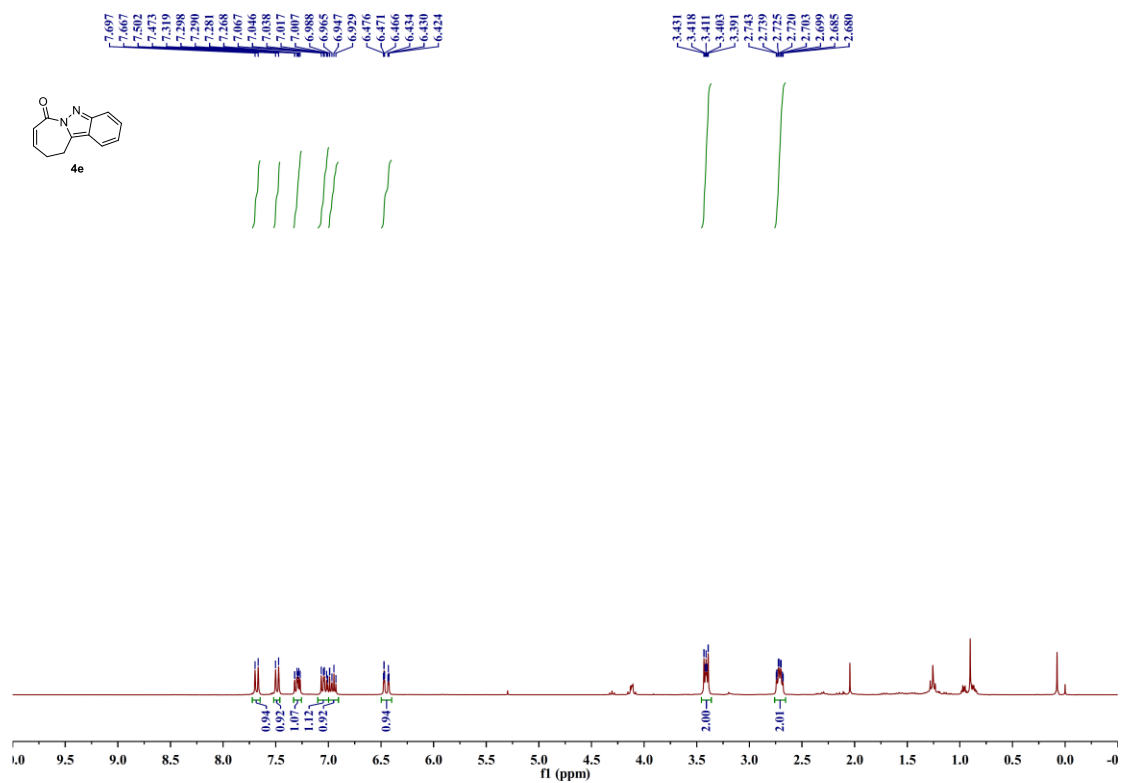

**Fig. S34.** <sup>1</sup>H NMR of compound **4e** (300 MHz, CDCl<sub>3</sub>).

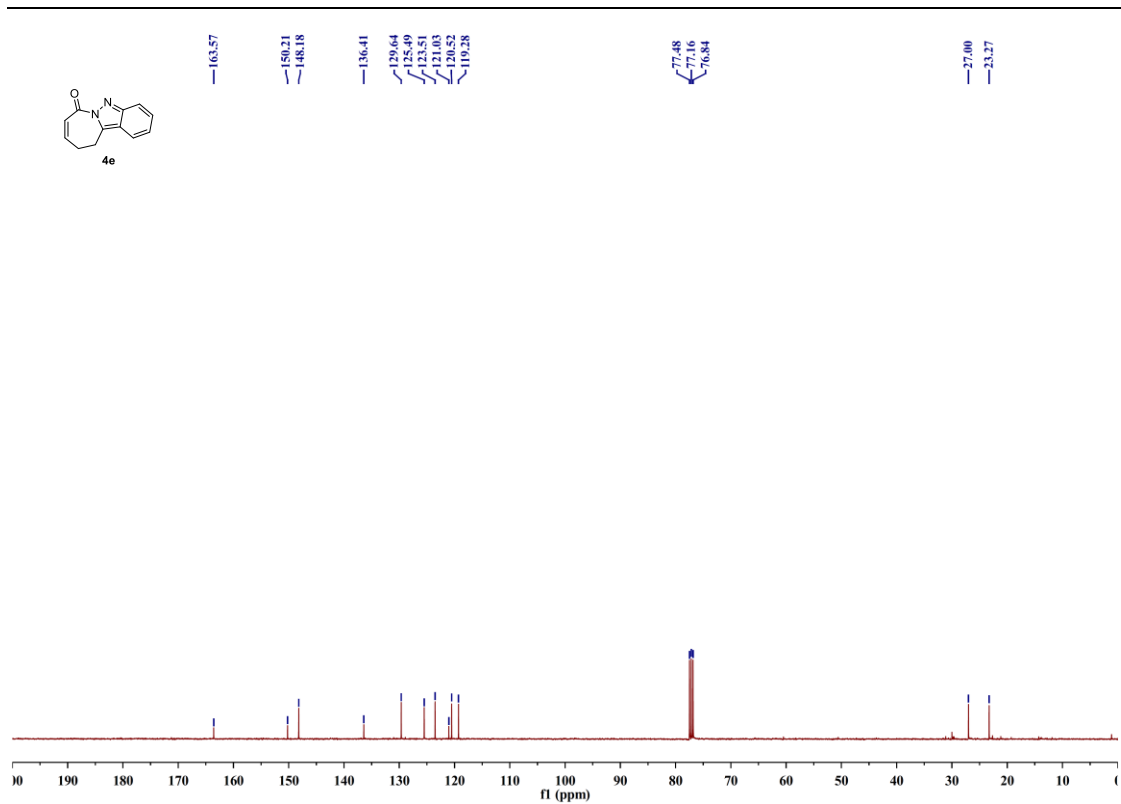

Fig. S35.  $^{13}\text{C}$  NMR of compound **4e** (100 MHz,  $\text{CDCl}_3$ ).

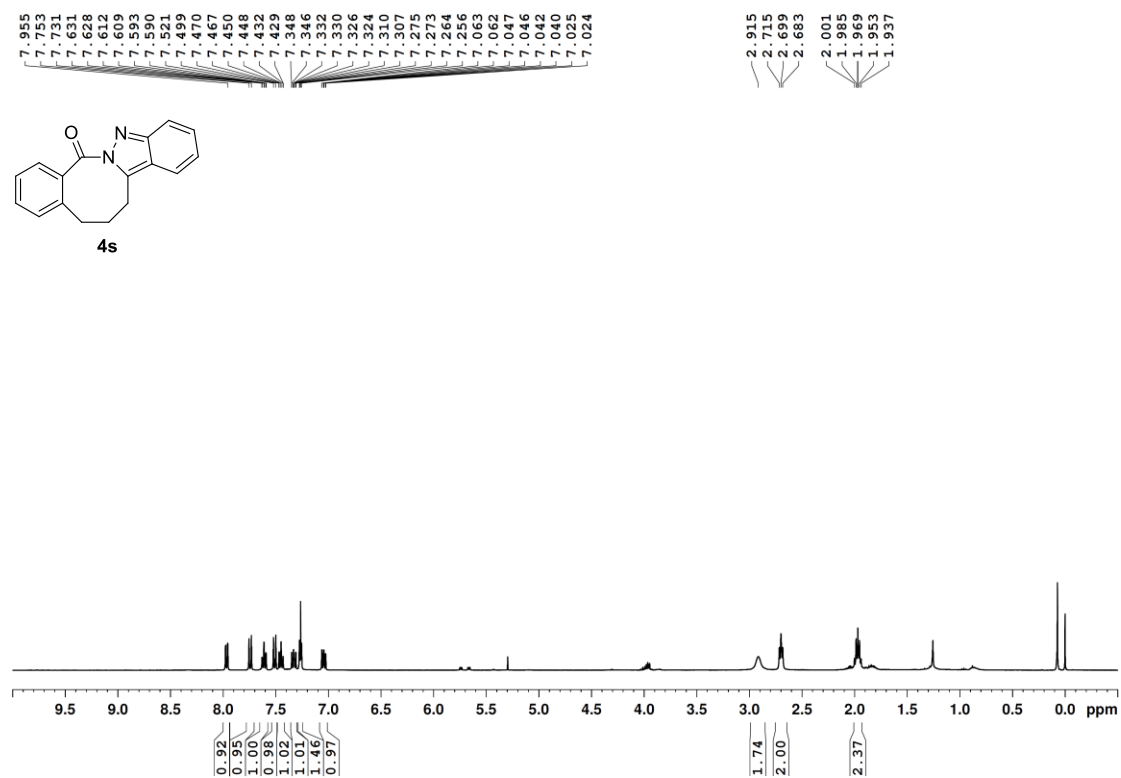

Fig. S36.  $^1\text{H}$  NMR of compound **4s** (400 MHz,  $\text{CDCl}_3$ ).

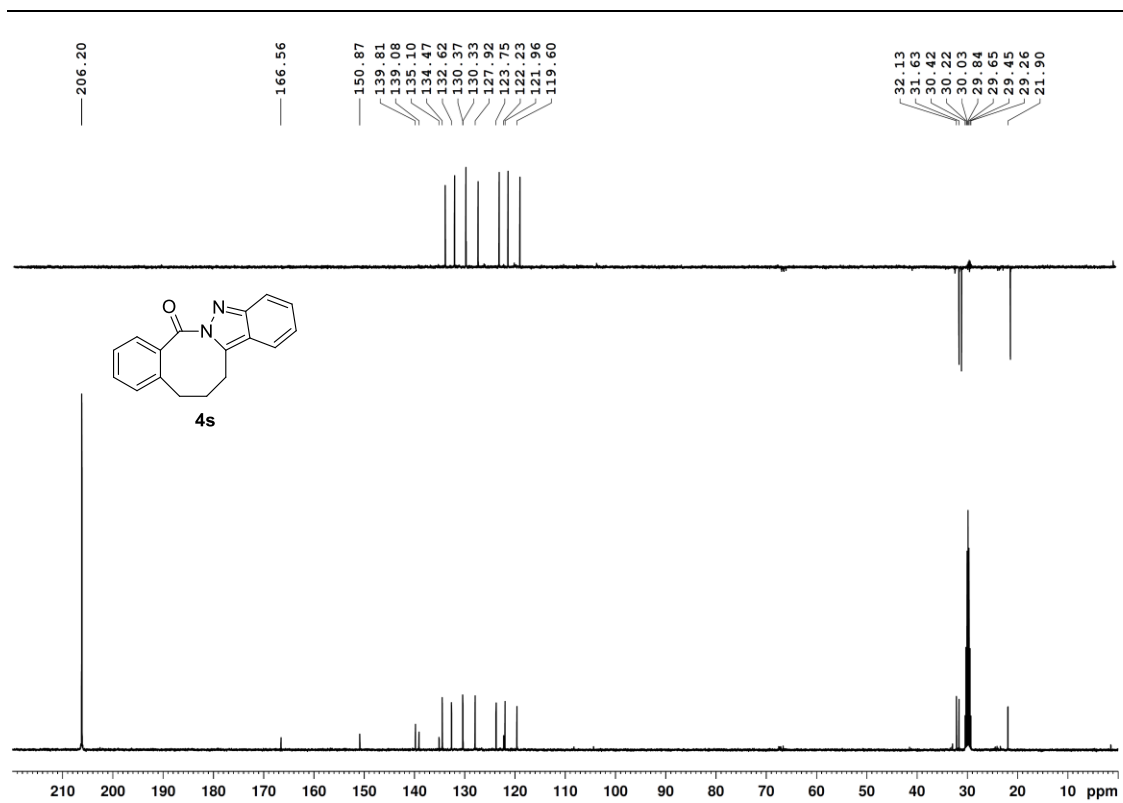

Fig. S37. <sup>13</sup>C and DEPT-135 NMR of compound **4s** (100 MHz, (CD<sub>3</sub>)<sub>2</sub>CO).

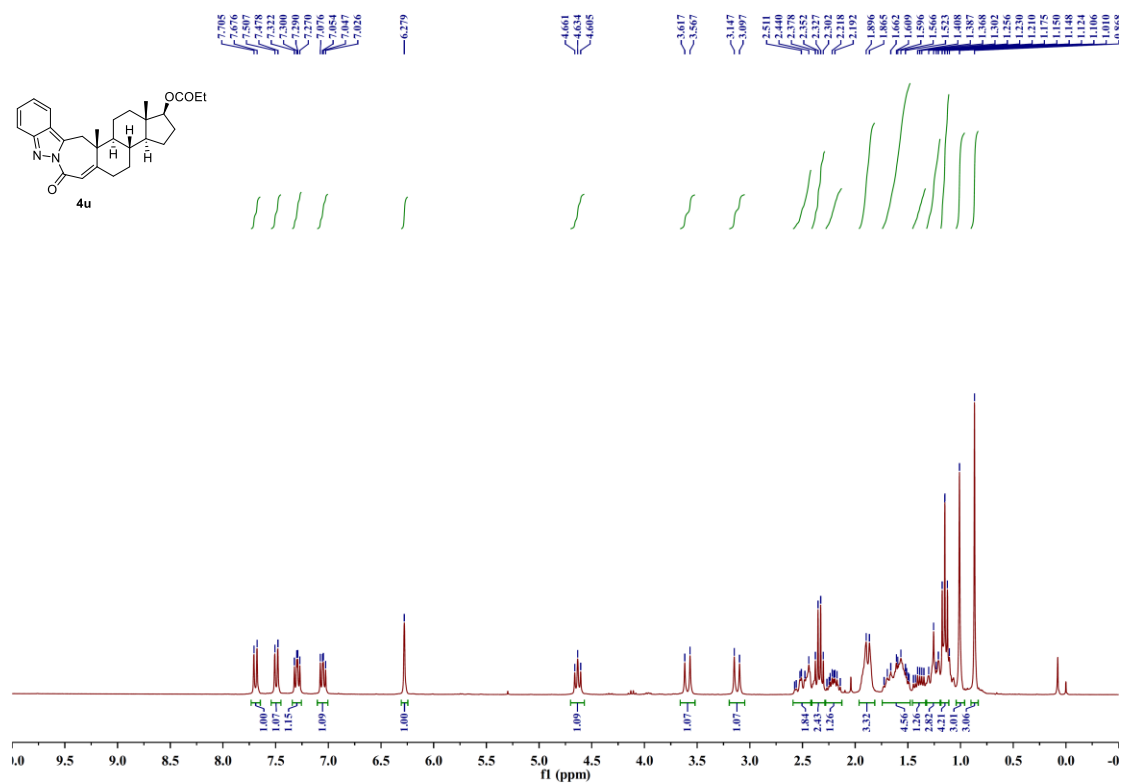

Fig. S38. <sup>1</sup>H NMR of compound **4u** (300 MHz, CDCl<sub>3</sub>).

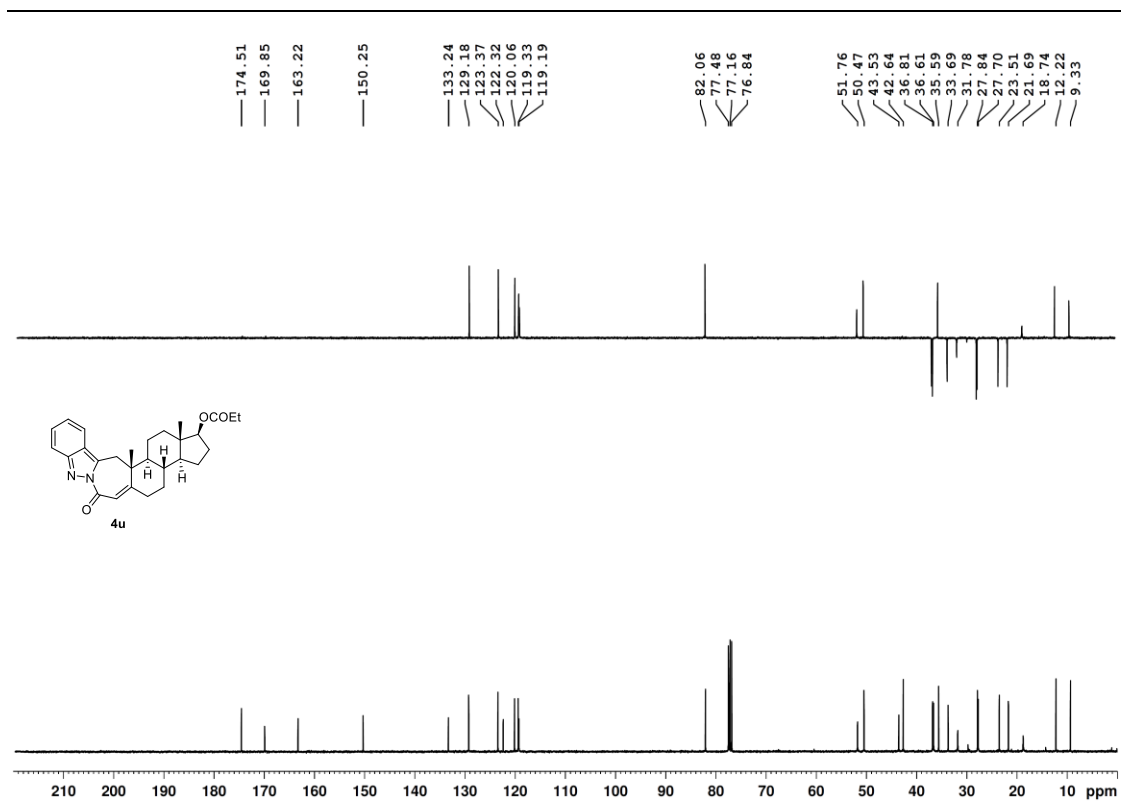

**Fig. S39.** <sup>13</sup>C and DEPT-135 NMR of compound **4u** (100 MHz, CDCl<sub>3</sub>).

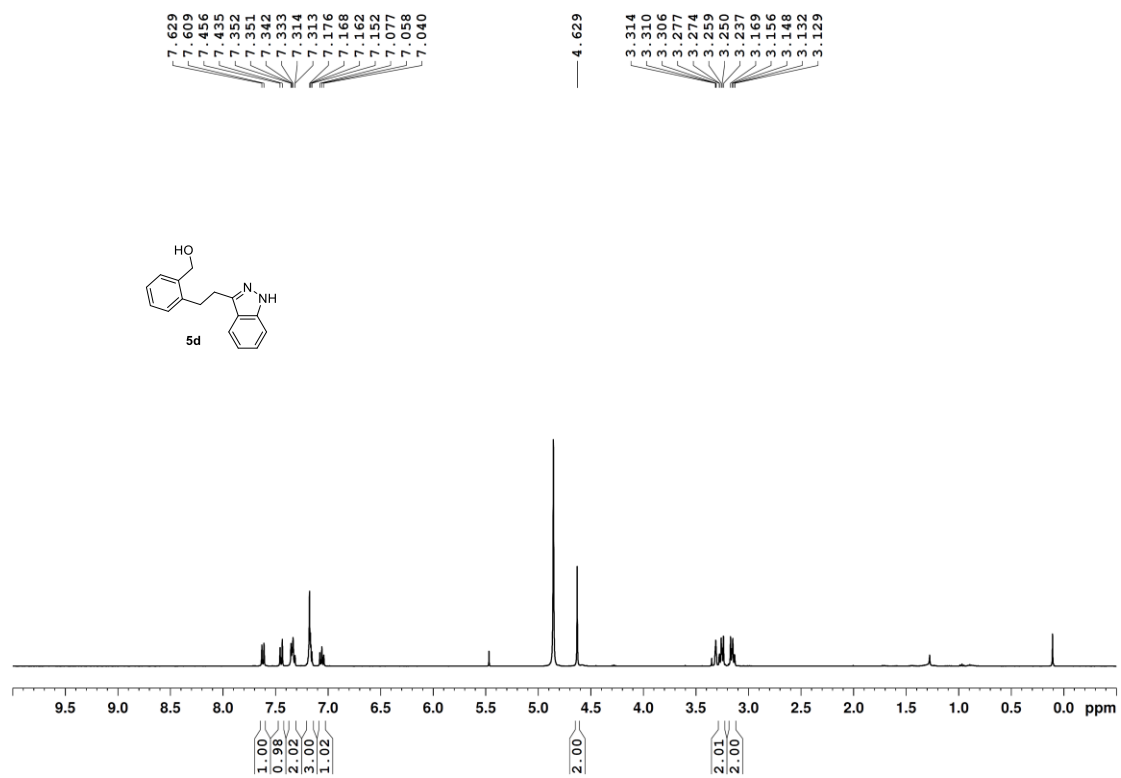

**Fig. S40.** <sup>1</sup>H NMR of compound **5d** (400 MHz, CD<sub>3</sub>OD).

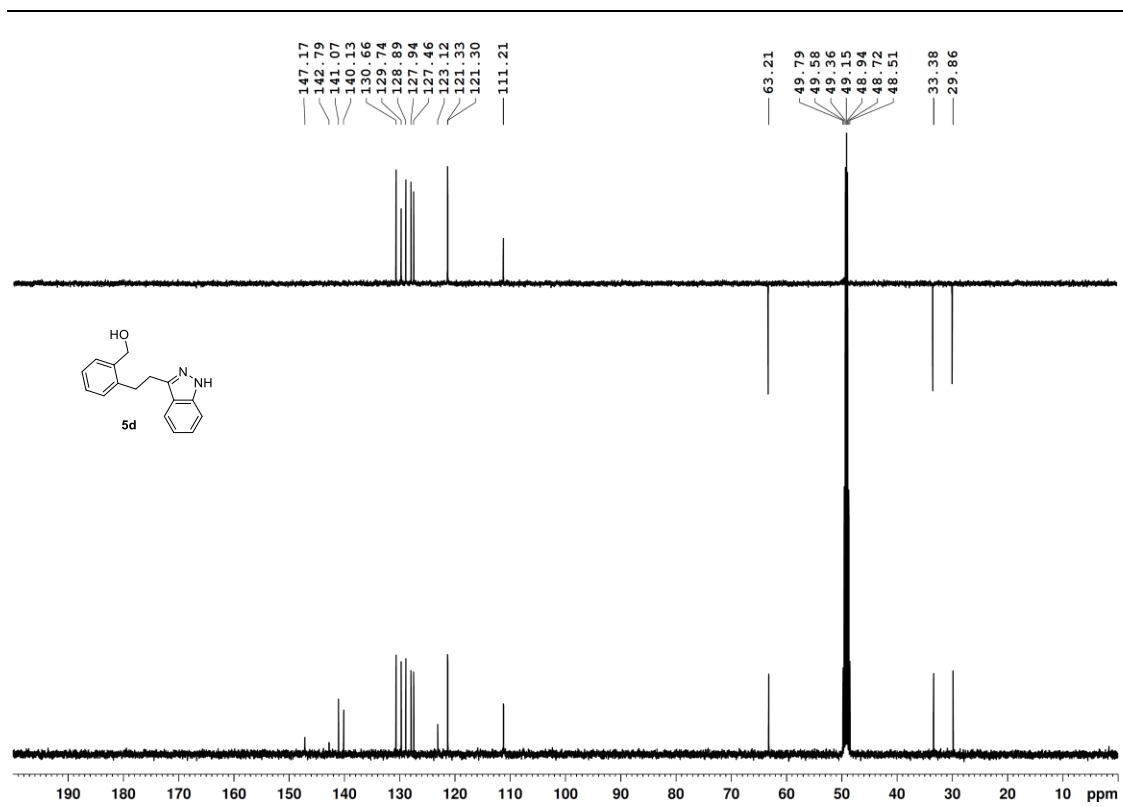

**Fig. S41.**  $^{13}\text{C}$  and DEPT-135 NMR of compound **5d** (100 MHz,  $\text{CD}_3\text{OD}$ ).
